# Supplementary material
Source: publisher figshare collection journal article supplement (https://acs.figshare.com/ndownloader/files/8011276)

# Supporting Information

## Linear and angular heteroacenes from double-electrophilic-cyclization (DEC) and DEC-reductive-elimination of diynes

Akhil Gupta and Bernard L. Flynn\*

Medicinal Chemistry, Monash Institute of Pharmaceutical Sciences, Monash University, 381 Royal Parade, Parkville Victoria 3052, Australia

### Contents

|                             |    |
|-----------------------------|----|
| Experimental details: ..... | S2 |
| Synthetic procedures: ..... | S3 |
| References: .....           | S8 |
| NMR Spectra .....           | S9 |

## Experimental details:

All reactions were performed under an inert atmosphere of anhydrous N<sub>2</sub> (g), unless otherwise stated. Solvents used for various reactions were dried using a commercial solvent purification system. 1,2-Dichloroethane (DCE) was purchased in an anhydrous form and stored under nitrogen. Solvents used in reaction extractions and chromatography and all other reagents were used as supplied by commercial vendors without further purifications or drying. Petroleum spirits with a boiling point range of 40–60 °C was used in chromatography. Column (flash) chromatography was performed on either 40–60 or 20–40 micron silica gel. <sup>1</sup>H NMR spectra were recorded at 300 or 400 MHz, as indicated. The following abbreviations were used to explain multiplicities: s = singlet, d = doublet, t = triplet, q = quartet, m = multiplet, br = broad, dd = doublet of doublets, dt = doublet of triplets. <sup>13</sup>C NMR spectra were recorded at 75 or 101 MHz, as indicated. <sup>77</sup>Se NMR and <sup>125</sup>Te NMR spectra were recorded at 76.3 and 126.30 MHz, respectively. All chemical shifts were calibrated using residual non-deuterated solvent as an internal reference and are reported in parts per million (δ) relative to trimethylsilane (δ = 0). Thin layer chromatography (TLC) was performed using 0.25 mm thick plates pre-coated with Merck Kieselgel 60 F<sub>254</sub> silica gel, and visualised using UV light (254 nm and 365 nm). Melting points were measured using a Gallenkamp MPD350 digital melting point apparatus and are uncorrected. For high-resolution mass spectra (HRMS), atmospheric-pressure chemical ionization (APCI) experiments were carried out on a Thermo Scientific Q-Exactive FTMS, ionizing by APCI from an atmospheric solids analysis probe (ASAP).

The following materials were prepared according to literature procedures: SCl<sub>2</sub>,<sup>S1</sup> SeCl<sub>2</sub>,<sup>S2</sup> methyl(2-(phenylethynyl)phenyl)sulfane (**6**),<sup>S3</sup> (2-ethynylphenyl)(methyl)sulfane (**9**),<sup>S3</sup> and (2-iodophenyl)(methyl)selane (**19**).<sup>S4</sup>

## Synthetic procedures:

### Bis(2-phenylbenzo[*b*]thiophen-3-yl)sulfane (7a)

Methyl(2-(phenylethynyl)phenyl)sulfane (**6**) (150 mg, 0.67 mmol) was dissolved in anhydrous DCE (12.0 mL) and the resulting yellow solution was heated to 60 °C. Sulfur dichloride (SCl<sub>2</sub>) (34 mg, 0.33 mmol) in DCE (5.0 mL) was added dropwise and the resulting red solution was stirred for 5 h. The reaction mixture was cooled to room temperature and was quenched with saturated Na<sub>2</sub>S<sub>2</sub>O<sub>3</sub> (20.0 mL). The organic layer was separated, washed with water followed by brine, dried over anhydrous MgSO<sub>4</sub>, and recovered to get crude mass which was subjected to column chromatography on silica (5% diethyl ether in hexane) to afford title compound **7a** (170 mg, 56.3%) as a light yellow solid: m.p. = 120.5–121.7 °C; <sup>1</sup>H NMR (400 MHz, CDCl<sub>3</sub>) δ (ppm): 7.68 (d, *J* = 8.2 Hz, 2H), 7.52–7.45 (m, 6H), 7.38–7.34 (m, 6H), 7.26–7.22 (m, 2H), 7.18–7.14 (ddd, *J* = 8.2, 7.2, 1.1 Hz, 2H); <sup>13</sup>C NMR (101 MHz, CDCl<sub>3</sub>) δ (ppm): 144.6, 140.7, 138.1, 133.6, 130.1, 128.6, 128.2, 124.7, 124.6, 123.4, 122.1, 120.3; HRMS (APCI): calculated for C<sub>28</sub>H<sub>18</sub>S<sub>3</sub> [M]<sup>+</sup> (m/z) 450.0565; found = 450.0564

### Bis(2-phenylbenzo[*b*]thiophen-3-yl)selane (7b)

This material was prepared using the procedure described above for **7a** using compound **6** (100 mg, 0.45 mmol) and selenium dichloride (SeCl<sub>2</sub>) (0.23 mmol in tetrahydrofuran). The crude residue was purified by flash chromatography on silica (30% diethyl ether in hexanes) to get 140 mg (62.5%) of **7b** as a yellow solid: m.p. = 115.3–116.7 °C; <sup>1</sup>H NMR (400 MHz, CDCl<sub>3</sub>) δ (ppm): 7.69–7.67 (m, 2H), 7.46–7.42 (m, 4H), 7.40–7.36 (m, 8H), 7.25–7.21 (ddd, *J* = 8.1, 7.2, 1.1 Hz, 2H), 7.15–7.11 (ddd, *J* = 8.1, 7.2, 1.1 Hz, 2H); <sup>13</sup>C NMR (101 MHz, CDCl<sub>3</sub>) δ (ppm): 145.5, 141.7, 138.7, 134.3, 130.3, 128.6, 128.2, 124.6, 124.7, 124.6, 121.9, 116.8; HRMS (APCI): calculated for C<sub>28</sub>H<sub>18</sub>S<sub>2</sub>[74]Se M<sup>+</sup> (m/z) 492.0069; found = 492.0075

### Bis(2-phenylbenzo[*b*]thiophen-3-yl)tellane (7d)

This material was prepared using the procedure described above for **7a** using compound **6** (80 mg, 0.35 mmol) and tellurium tetrachloride (TeCl<sub>4</sub>) (47 mg, 0.18 mmol). The crude residue was purified by flash chromatography on silica (50% diethyl ether in hexanes) to get 131 mg (68.5%) of **7d** as a light yellow solid: m.p. = 229.5–230.4 °C; <sup>125</sup>Te NMR (126.30 MHz, CDCl<sub>3</sub>) δ (ppm): 219.13; <sup>1</sup>H NMR (400 MHz, CDCl<sub>3</sub>) δ (ppm): 7.85–7.83 (d, *J* = 8.2 Hz, 2H), 7.71–7.68 (m, 4H), 7.63–7.59 (m, 6H), 7.35–7.33 (d, *J* = 8.2 Hz, 2H), 7.25–7.21 (m, 2H), 6.91–6.86 (ddd, *J* = 8.2, 7.2, 1.0 Hz, 2H); <sup>13</sup>C NMR (101 MHz, CDCl<sub>3</sub>) δ (ppm): 153.1, 139.8, 139.4, 134.0, 130.8, 129.8, 129.7, 126.3, 125.4, 124.7, 122.2, 119.8; HRMS (APCI): calculated for C<sub>28</sub>H<sub>18</sub>S<sub>2</sub>Te M<sup>+</sup> (m/z) 547.9907; found = 547.9897.

### 2,2'-Diphenyl-3,3'-bibenzo[*b*]thiophene (8)

This material was prepared using the procedure described above for **7a** using compound **6** (56 mg, 0.25 mmol) and gold (III) chloride (AuCl<sub>3</sub>) (39 mg in 1:1 solvent mixture of DCE and tetrahydrofuran, 0.13 mmol). The crude residue was purified by column chromatography on silica (10% diethyl ether in hexanes) to get 64 mg (61.2%) of **8** as an off-white solid: m.p. = 148.5–151.4 °C; <sup>1</sup>H NMR (400 MHz, CDCl<sub>3</sub>) δ (ppm): 7.91–7.89 (m, 2H), 7.38–7.34 (m, 4H), 7.27–7.23 (m, 2H), 7.12–7.02 (m, 10H); <sup>13</sup>C NMR (101 MHz, CDCl<sub>3</sub>) δ (ppm): 142.5, 140.8, 138.9, 134.2, 128.5, 128.3, 127.8, 126.5, 124.7, 124.6, 123.8, 122.3; HRMS (APCI): calculated for C<sub>28</sub>H<sub>18</sub>S<sub>2</sub> M<sup>+</sup> (m/z) 418.0844; found = 418.0845.

### 1,4-Bis(2-(methylthio)phenyl)buta-1,3-diyne (10)

Copper(II) acetate monohydrate [Cu(CH<sub>3</sub>COO)<sub>2</sub>·H<sub>2</sub>O] (3.23 g, 16.22 mmol) was taken in 1:1 solvent mixture of pyridine and methanol (30 mL), and the resulting blue suspension was heated to 80 °C. To this suspension was added (2-ethynylphenyl)(methyl)sulfane **9** (1.20 g, 8.11 mmol), and the resulting green reaction mixture was heated to reflux for 4 h. The reaction solution was cooled down to 10 °C and was slowly diluted with 2N H<sub>2</sub>SO<sub>4</sub> (30 mL) followed by the addition of diethyl ether (50 mL). The organic layer was separated, washed with water twice followed by brine, dried over anhydrous MgSO<sub>4</sub>, and recovered to afford title compound **10** (1.47 g, 61.6%) as a light yellow solid: m.p. = 98.6–100.4 °C; <sup>1</sup>H NMR (400 MHz, CDCl<sub>3</sub>) δ (ppm): 7.5 (d, *J* = 8.3 Hz, 2H), 7.40 (dd, *J* = 8.3, 7.6 Hz, 2H), 7.18 (dd, *J* = 8.3, 7.6 Hz, 2H), 7.10 (d, *J* = 7.6 Hz, 2H), 2.51 (s, 6H); <sup>13</sup>C NMR (101 MHz, CDCl<sub>3</sub>) δ (ppm): 143.3, 133.7, 129.7, 124.6, 124.5, 120.2, 80.7, 80.0, 15.4; HRMS (APCI): calculated for C<sub>18</sub>H<sub>14</sub>S<sub>2</sub> M<sup>+</sup> (m/z) 294.0531; found = 294.0534.

### Bis((2-(methylthio)phenyl)ethynyl)selane (11)

*n*-Butyllithium (1.10 mL, 2.20 mmol (2.0 M solution in hexanes)) was added dropwise to a solution of (2-ethynylphenyl) (methyl)sulfane **9** (296 mg, 2 mmol) in anhydrous tetrahydrofuran (THF) (10.0 mL) at –78 °C (dry ice-acetone bath) and the resultant yellow suspension left to stir at this temperature for 0.5 h. The dry ice-acetone bath was replaced with ice-bath and the reaction mixture was allowed to warm to 0 °C and stirred for 1 h at this temperature. The reaction mixture was placed back in dry ice-acetone bath and SeCl<sub>2</sub> (1 mmol in THF) was added dropwise, and the resulting reddish reaction mixture was left to stir overnight. Saturated ammonium chloride (20 mL) and diethyl ether (50 mL) were added to the reaction mixture and the organic layer was separated. Organic layer was washed with water (2 × 30 mL) followed by brine (30 mL), dried over anhydrous MgSO<sub>4</sub>, and concentrated to a red oil which was subjected to chromatography on silica eluting with 2% diethyl ether in petroleum spirits providing **11** as a dark yellow oil (386 mg, 51% yield). <sup>77</sup>Se NMR (76.3 MHz, CDCl<sub>3</sub>) δ (ppm): 183.79; <sup>1</sup>H NMR (401 MHz, CDCl<sub>3</sub>) δ (ppm): 7.44 (dd, *J* = 7.7, 1.1 Hz, 2H), 7.32–7.27 (m, 2H), 7.17 (d, *J* = 7.7 Hz, 2H), 7.09 (t, *J* = 7.7 Hz, 2H), 2.49 (s, 6H); <sup>13</sup>C NMR (101 MHz, CDCl<sub>3</sub>) δ (ppm): 142.4, 133.0, 129.4, 124.7, 124.4, 121.1, 97.9, 71.5, 15.4; HRMS (APCI): calculated for C<sub>18</sub>H<sub>15</sub>S<sub>2</sub>[<sup>74</sup>Se] [M+H]<sup>+</sup> (m/z) 368.9833; found = 368.9834

### Bis(benzothieno)[3,2-*b*:2',3'-*d*]thiophene (14a)

Compound **10** (74 mg, 0.25 mmol) and SCl<sub>2</sub> (26 mg, 0.25 mmol) were separately dissolved in anhydrous DCE (each substrate in 2.0 mL DCE), and were simultaneously added to heated DCE (2.0 mL) at 60 °C over the period of 2 h. The reaction solution was stirred for additional 1 h, cooled to room temperature and was quenched with saturated Na<sub>2</sub>S<sub>2</sub>O<sub>3</sub> (5.0 mL). Dichloromethane (5.0 mL) was added to the reaction mixture and the organic layer was separated, washed with water followed by brine, dried over anhydrous MgSO<sub>4</sub>, and recovered to give a crude red solid which was subjected to column chromatography on silica (20% diethyl ether in petroleum spirits) to afford title compound **14a** (48 mg, 65%) as a red solid: m.p. = 304–306 °C; <sup>1</sup>H NMR (400 MHz, CDCl<sub>3</sub>) δ (ppm): 7.86–7.80 (m, 4H), 7.47 (ddd, *J* = 8.0, 7.2, 1.1 Hz, 2H), 7.42–7.38 (m, 2H); <sup>13</sup>C NMR (101 MHz, CDCl<sub>3</sub>) δ (ppm): 138.6, 137.1, 134.1, 125.9, 125.5, 123.5, 122.9, 120.9; HRMS (APCI): calculated for C<sub>16</sub>H<sub>8</sub>S<sub>3</sub> M<sup>+</sup> (m/z) 295.9788; found = 295.9783

### Selenolo[3,2-*b*:4,5-*b'*]bis[1]benzothiophene (14b)

Compound **10** (74 mg, 0.25 mmol) and SeCl<sub>2</sub> (0.25 mmol) were taken in anhydrous DCE (2.0 mL) and anhydrous THF (2.0 mL), respectively, and were simultaneously added to heated DCE

(2.0 mL) at 70 °C over the period of 2 h. The reaction solution was stirred for additional 1 h, cooled to room temperature and was quenched with saturated Na<sub>2</sub>S<sub>2</sub>O<sub>3</sub> (5.0 mL). The work-up of this reaction was carried out using the procedure described above for **14a**. Titled compound **14b** was obtained as a brick-red solid (59 mg, 68%): m.p. = 182.6–183.1 °C; <sup>77</sup>Se NMR (76.3 MHz, CDCl<sub>3</sub>) δ (ppm): 221.46; <sup>1</sup>H NMR (401 MHz, CDCl<sub>3</sub>) δ (ppm): 7.83 (ddd, *J* = 8.6, 1.8, 0.8 Hz, 4H), 7.48 (ddd, *J* = 8.0, 7.2, 1.1 Hz, 2H), 7.40 (ddd, *J* = 8.3, 7.2, 1.3 Hz, 2H); <sup>13</sup>C NMR (101 MHz, CDCl<sub>3</sub>) δ (ppm): 138.9, 138.7, 135.8, 125.8, 125.5, 124.7, 122.7, 114.7; HRMS (APCI): calculated for C<sub>16</sub>H<sub>8</sub>S<sub>2</sub>Se M<sup>+</sup> (m/z) 343.9226; found = 343.9217.

#### **Tellurolo[3,2-*b*:4,5-*b'*]bis[1]benzothiophene (14d)**

This material was prepared using the procedure described above for **14b** using compound **10** (74 mg, 0.25 mmol) and tellurium tetrachloride (TeCl<sub>4</sub>) (68 mg, 0.25 mmol). The crude reaction mass was subjected to flash chromatography to afford **14d** as a yellow solid (74 mg, 76%): m.p. = 286.2–287.9 °C; <sup>125</sup>Te NMR (126.30 MHz, CDCl<sub>3</sub>) δ (ppm): 189.54; <sup>1</sup>H NMR (401 MHz, CDCl<sub>3</sub>) δ (ppm): 7.93–7.90 (m, 2H), 7.74–7.71 (m, 2H), 7.46–7.37 (m, 4H); <sup>13</sup>C NMR (101 MHz, CDCl<sub>3</sub>) δ (ppm): 140.7, 140.2, 135.8, 125.3, 125.1, 123.9, 123.8, 122.7; HRMS (APCI): calculated for C<sub>16</sub>H<sub>8</sub>S<sub>2</sub>Te [M+H]<sup>+</sup> (m/z) 394.9204; found = 394.9205

#### **[1,4]Diselenino[2,3-*b*:6,5-*b'*]bibenzo[*b*]thiophene (15)**

This material was prepared using the procedure described above for **14b** using compound **11** (100 mg, 0.26 mmol) and SeCl<sub>2</sub> (0.26 mmol). The crude reaction mass was subjected to column chromatography on silica (5% diethyl ether in petroleum spirits) to afford title compound **15** as a yellow solid (66 mg, 60%): m.p. = 166–168 °C; <sup>77</sup>Se NMR (76.3 MHz, CDCl<sub>3</sub>) δ (ppm): 352.94, 295.92; <sup>1</sup>H NMR (401 MHz, CDCl<sub>3</sub>) δ (ppm): 7.84–7.81 (ddd, *J* = 8.0, 1.2, 0.7 Hz, 2H), 7.79–7.76 (m, 2H), 7.44–7.40 (m, 2H), 7.37–7.32 (m, 2H); <sup>13</sup>C NMR (101 MHz, CDCl<sub>3</sub>) δ (ppm): 143.1, 138.6, 127.1, 126.0, 125.1, 125.1, 122.4, 122.4; HRMS (APCI): calculated for C<sub>16</sub>H<sub>8</sub>S<sub>2</sub>Se<sub>2</sub> M<sup>+</sup> (m/z) 423.8392; found = 423.8394

#### **Selenopheno[2,3-*b*:5,4-*b'*]bibenzo[*b*]thiophene (16)**

This material was prepared using the procedure described above for **14b** using compound **11** (100 mg, 0.26 mmol) and gold (III) chloride (AuCl<sub>3</sub>) (78 mg, 0.26 mmol). The crude reaction mass was subjected to column chromatography on silica (2% diethyl ether in petroleum spirits) to afford title compound **16** as an off white solid (46 mg, 51%): m.p. = 172.5–177.4 °C; <sup>77</sup>Se NMR (76.3 MHz, CDCl<sub>3</sub>) δ (ppm): 507.01; <sup>1</sup>H NMR (401 MHz, CDCl<sub>3</sub>) δ (ppm): 8.75–8.73 (d, *J* = 8.1 Hz, 2H), 7.93–7.91 (d, *J* = 8.1 Hz, 2H), 7.58–7.54 (ddd, *J* = 8.3, 7.2, 1.2 Hz, 2H), 7.43–7.39 (ddd, *J* = 7.2, 5.2, 1.1 Hz, 2H); <sup>13</sup>C NMR (101 MHz, CDCl<sub>3</sub>) δ (ppm): 144.3, 139.4, 136.2, 133.9, 124.6, 123.7, 123.4, 123.4; HRMS (APCI): calculated for C<sub>16</sub>H<sub>9</sub>S<sub>2</sub>[<sup>74</sup>Se] [M+H]<sup>+</sup> (m/z) 338.9365; found = 338.9365.

#### **(2-(Buta-1,3-diyn-1-yl)phenyl)(methyl)sulfane (18)**

(Iodoethynyl)trimethylsilane (464 mg, 2.07 mmol) was dissolved in triethylamine (15 mL) and the reaction solution was degassed. To this reaction mixture was added Pd(PPh<sub>3</sub>)<sub>4</sub> (68 mg, 3 mol%) and CuI (23.5 mg, 6 mol%), and the resultant suspension was degassed and stirred for 15 min at room temperature. Then (2-ethynylphenyl)(methyl)sulfane (**9**) (337 mg, 2.27 mmol) in triethylamine was added dropwise over the period of 30 min and the resulting reaction mixture was left to stir overnight. The mixture was filtered and concentrated to a residue which was taken in diethyl ether and washed with water twice followed by brine. The organic layer was taken in a conical flask containing a mixture of anhydrous MgSO<sub>4</sub> and carbon, stirred well for 10 min, filtered through Celite, and concentrated to a brown liquid (535 mg), which was

immediately taken up in methanol (20 mL) and KF (255 mg, 4.40 mmol) was added to this solution at room temperature. The reaction mixture was stirred overnight and was diluted with water. Diethyl ether was added and the organic layer was separated, washed with water twice followed by brine, and was concentrated to afford a crude brown mass which was subjected to silica gel column chromatography (petroleum spirits: diethyl ether 9.9: 0.5) to afford title compound **18** as a tan oil (160 mg, 41%). <sup>1</sup>H NMR (401 MHz, CDCl<sub>3</sub>) δ (ppm): 7.49 – 7.45 (m, 1H), 7.33 (ddd, *J* = 8.0, 7.5, 1.5 Hz, 1H), 7.17 (d, *J* = 7.8 Hz, 1H), 7.09 (td, *J* = 7.6, 1.1 Hz, 1H), 2.61 (s, 1H), 2.50 (s, 3H). The NMR data of **18** matched with the literature reported spectrum.<sup>S5</sup>

### Methyl(2-((2-(methylselanyl)phenyl)buta-1,3-diyn-1-yl)phenyl)sulfane (**20**)

(2-Iodophenyl)(methyl)selane (121 mg, 0.41 mmol) was dissolved in diisopropylamine (10 mL) and the reaction solution was degassed. To this reaction mixture was added Pd(PPh<sub>3</sub>)<sub>4</sub> (14 mg, 3 mol%) and CuI (4.7 mg, 6 mol%), and the resultant suspension was degassed and stirred for 15 min at room temperature. Then compound **18** (70 mg, 0.41 mmol) in THF was added dropwise over the period of 30 min and the resulting reaction mixture was left to stir overnight. The mixture was filtered and concentrated to a residue which was taken in diethyl ether and washed with water twice followed by brine. The organic layer was taken in a conical flask containing a mixture of anhydrous MgSO<sub>4</sub> and carbon, stirred well for 10 min, filtered through Celite, and concentrated to a brown liquid which was subjected to column chromatography on silica gel (5% diethyl ether in petroleum spirits) to afford title compound **20** as a light brown oil (50 mg, 35%). <sup>77</sup>Se NMR (76.3 MHz, CDCl<sub>3</sub>) δ (ppm): 212.78; <sup>1</sup>H NMR (400 MHz, CDCl<sub>3</sub>) δ (ppm): 7.52–7.48 (m, 2H), 7.35–7.27 (m, 3H), 7.19–7.08 (m, 3H), 2.52 (s, 3H), 2.38 (s, 3H); <sup>13</sup>C NMR (101 MHz, CDCl<sub>3</sub>) δ (ppm): 143.4, 137.6, 133.8, 133.7, 129.7, 128.2, 125.5, 124.7, 124.5, 123.6, 122.8, 120.3, 81.6, 80.7, 79.9, 79.2, 15.4, 6.7; HRMS (APCI): calculated for C<sub>18</sub>H<sub>15</sub>S[<sup>74</sup>Se] [M+H]<sup>+</sup> (*m/z*) 337.0114; found = 337.0114

### Benzo[*b*]selenopheno[2',3':4,5]telluropheno[3,2-*b*]benzo[*b*]thiophene (**21**)

This material was prepared using the procedure described above for **14d** using compound **20** (50 mg, 0.14 mmol) and tellurium tetrachloride (TeCl<sub>4</sub>) (37 mg, 0.14 mmol). The crude reaction mass was subjected to flash chromatography on silica gel (5% diethyl ether in petroleum spirits) to afford **21** as a yellow solid (38 mg, 62%): m.p. = 254–256 °C; <sup>77</sup>Se NMR (76.3 MHz, CDCl<sub>3</sub>) δ (ppm): 547.15; <sup>125</sup>Te NMR (126.3 MHz, CDCl<sub>3</sub>) δ (ppm): 222.97; <sup>1</sup>H NMR (401 MHz, CDCl<sub>3</sub>) δ (ppm): 7.96–7.94 (m, 1H), 7.92–7.89 (m, 1H), 7.73–7.70 (m, 2H), 7.45–7.39 (m, 3H), 7.34–7.30 (m, 1H); <sup>13</sup>C NMR (101 MHz, CDCl<sub>3</sub>) δ (ppm): 142.3, 141.3, 140.9, 140.3, 139.1, 134.5, 133.4, 127.7, 126.8, 125.8, 125.4, 125.2, 125.0, 124.4, 123.8, 122.9; HRMS (APCI): calculated for C<sub>16</sub>H<sub>8</sub>SSeTe M<sup>+</sup> (*m/z*) 439.8559; found = 439.8559

### 3,3'-Diiodo-2,2'-bibenzo[*b*]thiophene (**22**)

Compound **10** (300 mg, 1.02 mmol) was dissolved in anhydrous DCE (20.0 mL), and iodine (545 mg, 2.14 mmol) was added at room temperature. The reaction mixture was stirred at 50 °C for 5 h, cooled to room temperature and was quenched with saturated Na<sub>2</sub>S<sub>2</sub>O<sub>3</sub> (20.0 mL). The organic layer was separated, washed with brine, dried over anhydrous MgSO<sub>4</sub>, and recovered to get **22** as a light brown solid (450 mg, 85% yield): m.p. = 216–218 °C; <sup>1</sup>H NMR (400 MHz, CDCl<sub>3</sub>) δ (ppm): 7.87–7.83 (m, 4H), 7.54–7.45 (dtd, *J* = 14.9, 7.2, 1.3 Hz, 4H); <sup>13</sup>C NMR (101 MHz, CDCl<sub>3</sub>) δ (ppm): 141.1, 140.3, 135.4, 126.6, 126.5, 125.8, 122.4, 86.7; HRMS (APCI): calculated for C<sub>16</sub>H<sub>8</sub>I<sub>2</sub>S<sub>2</sub> M<sup>+</sup> (*m/z*) 517.8151; found = 517.8153.

#### 4-Benzylidene-4*H*-cyclopenta[2,1-*b*:3,4-*b'*]bibenzo[*b*]thiophene (23)

Compound **22** (52 mg, 0.10 mmol) was dissolved in dimethylformamide (5.0 mL) at room temperature under  $N_2$  (g) atmosphere. To this solution was added  $Pd(OAc)_2$  (1.2 mg, 5 mol%), triphenylphosphine (37 mg, 0.14 mmol), potassium acetate (98 mg, 1.0 mmol), and styrene (31 mg, 0.30 mmol), and the resulting reaction mixture was stirred at 80 °C for 18 h. The reaction mixture was cooled to room temperature, diluted with water (15 mL), and extracted with ethyl acetate ( $2 \times 15$  mL). The organic layer was washed with water followed by brine, dried (anhydrous  $MgSO_4$ ), and concentrated to get reddish-brown solid which was subjected to column chromatography on silica (10% diethyl ether in petroleum spirits) to get **23** (23 mg, 62%) as a dark red solid: m.p. = 139–142 °C;  $^1H$  NMR (400 MHz,  $CDCl_3$ )  $\delta$  (ppm): 8.10–8.07 (m, 2H), 7.86–7.84 (d,  $J$  = 8.0 Hz, 1H), 7.73–7.71 (m, 1H), 7.59–7.56 (m, 2H), 7.47–7.41 (m, 4H), 7.30–7.27 (m, 1H), 7.11–7.07 (ddd,  $J$  = 8.1, 7.1, 1.1 Hz, 1H), 6.91–6.86 (ddd,  $J$  = 8.3, 7.1, 1.2 Hz, 1H), 6.26–6.23 (d,  $J$  = 8.1 Hz, 1H);  $^{13}C$  NMR (101 MHz,  $CDCl_3$ )  $\delta$  (ppm): 143.9, 143.2, 142.5, 141.9, 141.5, 139.7, 138.5, 137.9, 137.2, 134.5, 134.1, 134.0, 131.7, 130.7, 129.0, 128.9, 125.7, 124.5, 124.4, 123.7, 123.6, 123.5, 123.1, 121.3; HRMS (APCI): calculated for  $C_{24}H_{15}S_2$   $[M+H]^+$  (m/z) 367.0610; found = 367.0604.

#### 2-(11*H*-benzo[4,5]thieno[3,2-*b*]benzo[4,5]thieno[2,3-*d*]pyrrol-11-yl)-*N,N*-dimethylethane-1-amine (24)

Compound **22** (52 mg, 0.10 mmol) was dissolved in dry toluene (7.0 mL). To this mixture was added  $Cs_2CO_3$  (81 mg, 0.25 mmol) and  $CuI$  (48 mg, 0.25 mmol), and the resulting suspension was stirred for 15 min while  $N_2$  (g) was bubbled through the mixture. Then *N,N*-dimethylethane-1,2-diamine (62 mg, 0.70 mmol) was added to the stirred solution and the resulting reaction mixture was stirred overnight at 100 °C. The reaction mixture was cooled to room temperature, diluted with ethyl acetate (20.0 mL), and washed with water ( $2 \times 20.0$  mL) followed by brine (20.0 mL). The organic layer was dried ( $MgSO_4$ ) and concentrated to get crude brown mass which was subjected to column chromatography on silica (20% methanol/ethyl acetate) to afford title compound **24** (15 mg, 42%) as a light brown solid: m.p. = 152–154 °C;  $^1H$  NMR (400 MHz,  $CDCl_3$ )  $\delta$  (ppm): 7.90 (d,  $J$  = 7.6 Hz, 1H), 7.84 (d,  $J$  = 7.6 Hz, 1H), 7.40 (t,  $J$  = 7.6 Hz, 1H), 7.28 (t,  $J$  = 7.6 Hz, 1H), 4.82 (t,  $J$  = 7.0 Hz, 2H), 2.88 ( $J$  = 7.0 Hz, 2H), 2.43 (s, 6H);  $^{13}C$  NMR (101 MHz,  $CDCl_3$ )  $\delta$  (ppm): 141.9, 137.4, 127.4, 124.6, 124.5, 123.3, 118.7, 114.9, 59.3, 46.2, 46.0; HRMS (APCI): calculated for  $C_{20}H_{19}N_2S_2$   $[M+H]^+$  (m/z) 351.0984; found = 351.0990.

#### 11,11-Dimethyl-benzo[4,5]thieno[3,2-*b*]benzo[4,5]thieno[2,3-*d*]germole (25)

*n*-Butyllithium (0.21 mL, 0.42 mmol (2.0 M solution in hexanes)) was added dropwise to a solution of compound **22** (104 mg, 0.2 mmol) in anhydrous tetrahydrofuran (THF) (10.0 mL) at –78 °C, and the resultant yellow suspension was left to stir at this temperature for 5 min. Dichlorodimethylgermane (38 mg, 0.22 mmol) was added at once and the resulting reaction mixture was left to stir overnight. Saturated ammonium chloride (20 mL) and diethyl ether (30 mL) were added to the reaction mixture and the organic layer was separated. Organic layer was washed with water ( $2 \times 30$  mL) followed by brine (30 mL), dried over anhydrous  $MgSO_4$ , and concentrated to a light yellow oil which was subjected to chromatography on silica eluting with 2% diethyl ether in petroleum spirits providing **25** as an off-white semi-solid (44 mg, 60% yield).  $^1H$  NMR (400 MHz,  $CDCl_3$ )  $\delta$  (ppm): 7.91–7.88 (dd,  $J$  = 8.0, 0.8 Hz, 2H), 7.75–7.72 (m, 2H), 7.40–7.36 (m, 2H), 7.32–7.28 (ddd,  $J$  = 8.2, 7.2, 1.2 Hz, 2H), 0.81 (s, 6H);  $^{13}C$  NMR

(101 MHz, CDCl<sub>3</sub>)  $\delta$  (ppm): 146.5, 143.5, 141.7, 140.6, 125.1, 123.9, 123.7, 123.4, 29.8;  
HRMS (APCI): calculated for C<sub>18</sub>H<sub>14</sub>S<sub>2</sub>[70]Ge M<sup>+</sup> (m/z) 363.9774; found = 363.9775

## References:

- S1. R. Bishop, *Org. Synth.*, 1992, **70**, 120–128
- S2. A. Maaninen, T. Chivers, M. Parvez, J. Pietikäinen and R. S. Laitinen, *Inorg. Chem.*, 1999, **38**, 4093–4097
- S3. A. Gupta and B. L. Flynn, *J. Org. Chem.* 2016, **81**, 4012–4019.
- S4. T. Kesharwani, S. A. Worlikar and R. C. Larock, *J. Org. Chem.* 2006, **71**, 2307–2312
- S5. R. A. Aitken and S. Seth, *J. Chem. Soc., Perkin Trans. 1*, 1994, 2461–2466



## NMR Spectra

### Bis(2-phenylbenzo[*b*]thiophen-3-yl)sulfane (7a)

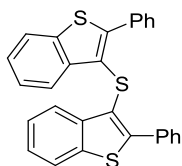

#### <sup>1</sup>H NMR:

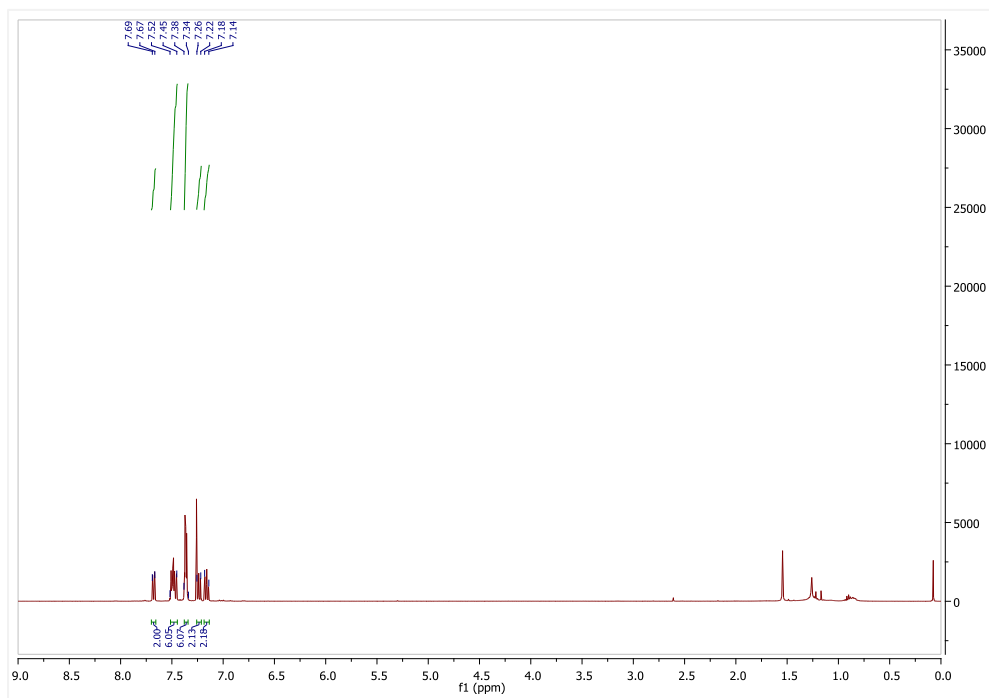

#### <sup>13</sup>C NMR:

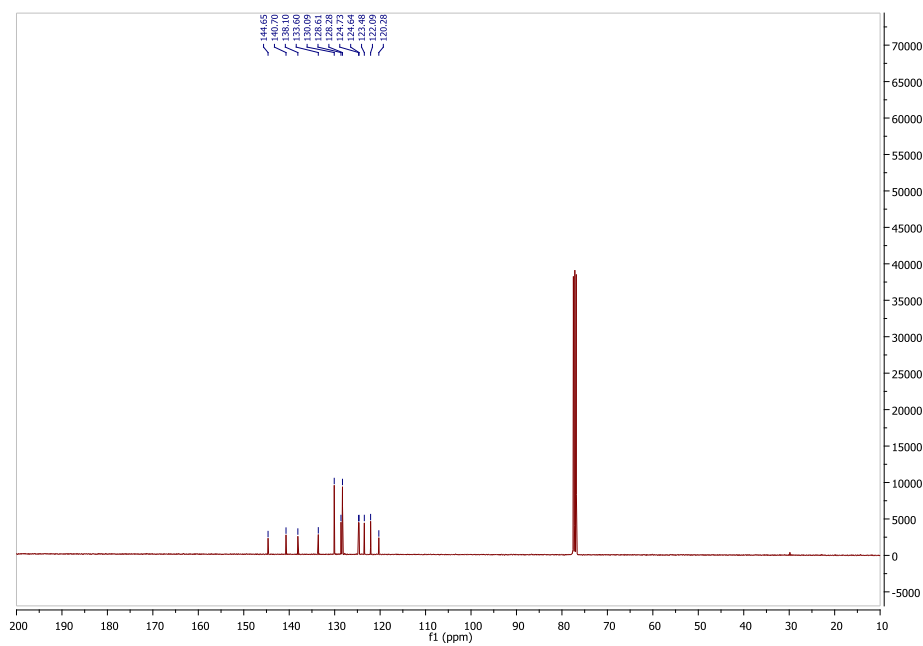

Chemical structure of compound 10b is shown in the top left corner. The structure is a substituted benzene ring with a carboxylic acid group (-COOH) and a side chain containing a double bond and a methyl group.

The  $^1\text{H}$  NMR spectrum (CDCl<sub>3</sub>) shows the following peaks and integrations:

- Peak at  $\delta \approx 7.7$  ppm (integration 2.04)
- Peak at  $\delta \approx 7.6$  ppm (integration 4.02)
- Peak at  $\delta \approx 7.5$  ppm (integration 8.12)
- Peak at  $\delta \approx 7.4$  ppm (integration 2.18)
- Peak at  $\delta \approx 7.3$  ppm (integration 2.19)
- Peak at  $\delta \approx 1.5$  ppm (integration 1.00)
- Peak at  $\delta \approx 0.1$  ppm (integration 1.00)

## Bis(2-phenylbenzo[b]thiophen-3-yl)tellane (7d)

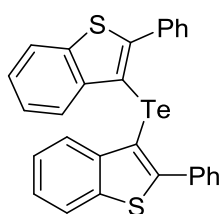

$^{125}\text{Te}$  NMR:

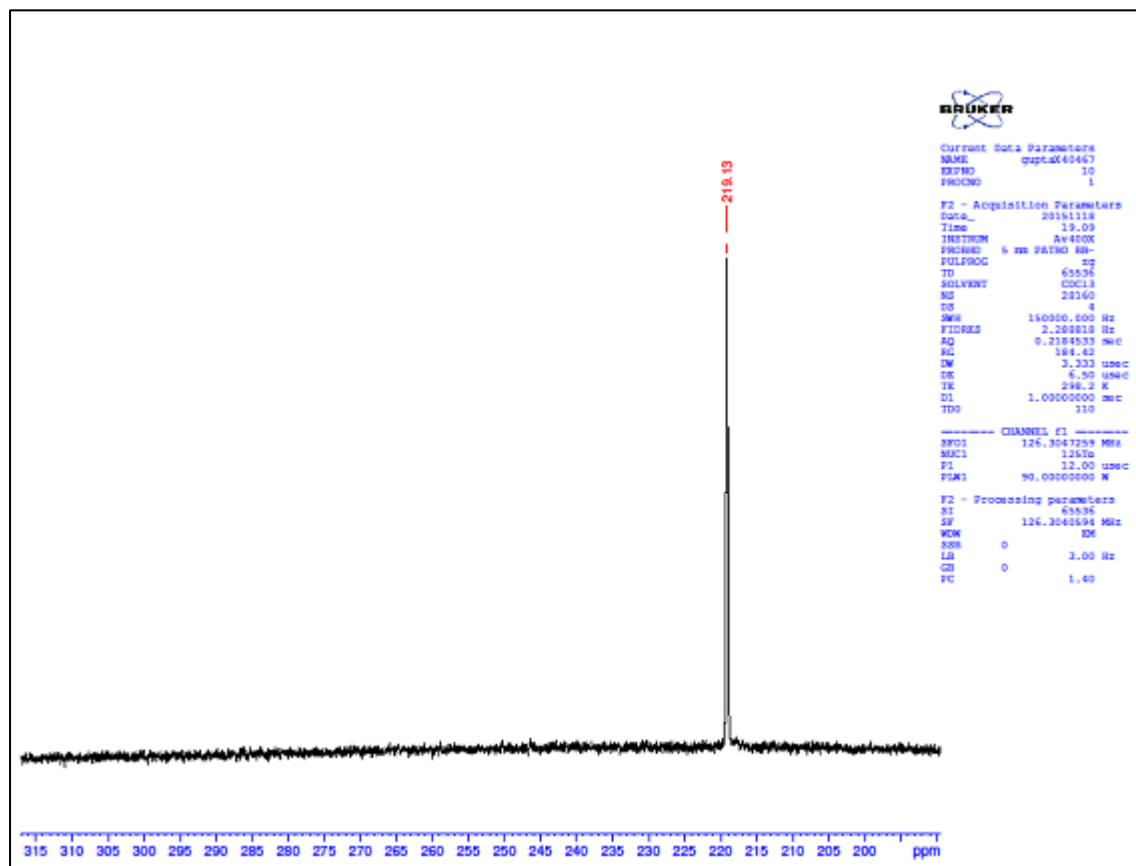

# <sup>1</sup>H NMR:

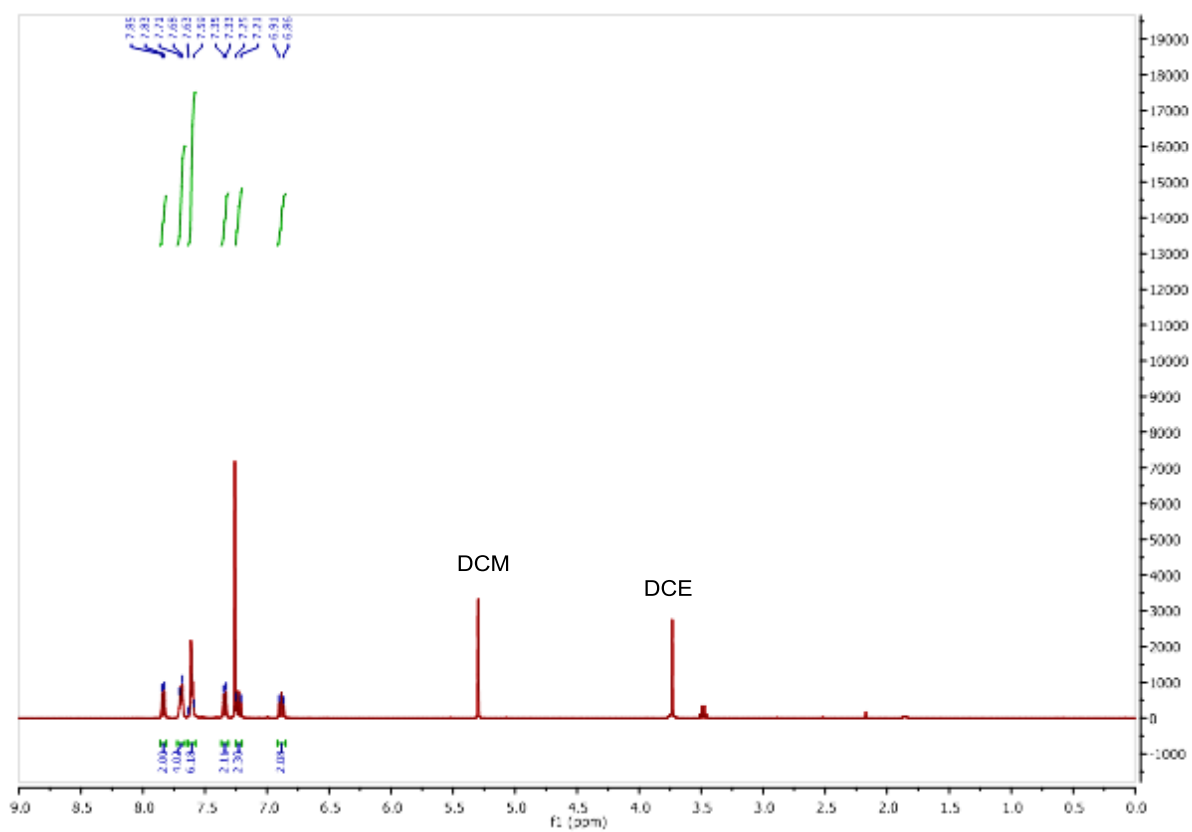

# <sup>13</sup>C NMR:

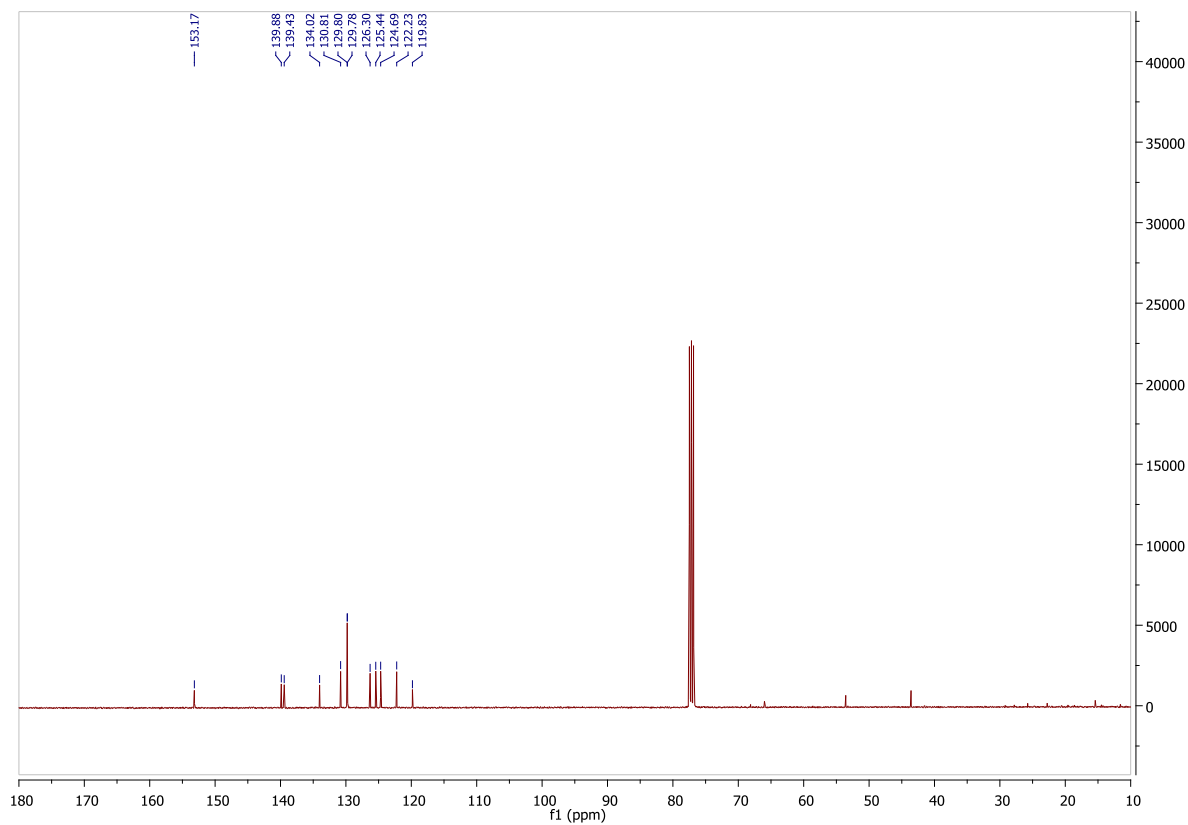

## 2,2'-Diphenyl-3,3'-bibenzo[b]thiophene (8)

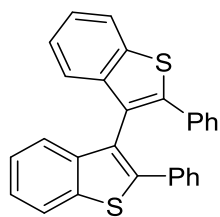

### $^1\text{H}$ NMR:

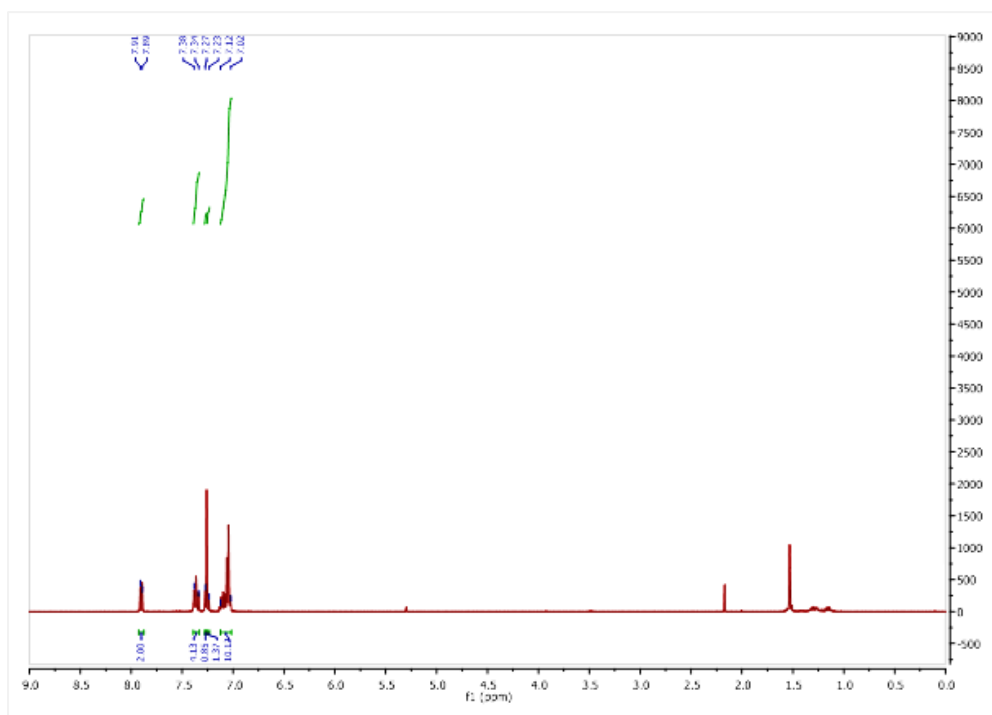

### $^{13}\text{C}$ NMR:

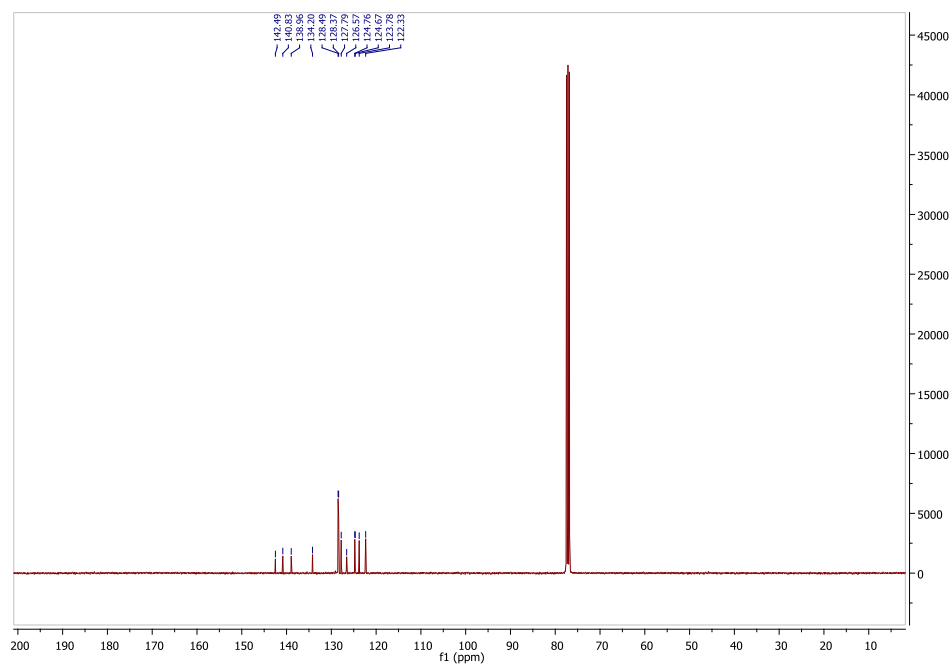

### 1,4-Bis(2-(methylthio)phenyl)buta-1,3-diyne (10)

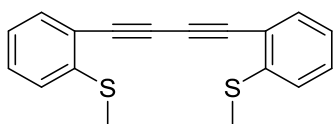

### $^1\text{H}$ NMR:

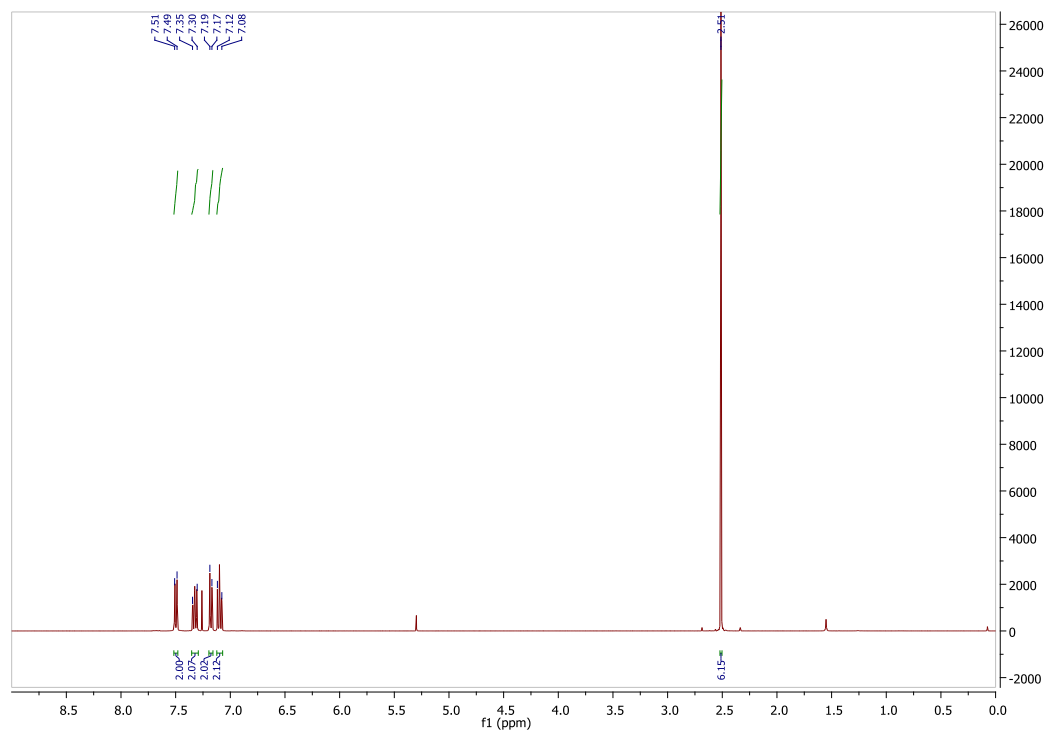

### $^{13}\text{C}$ NMR:

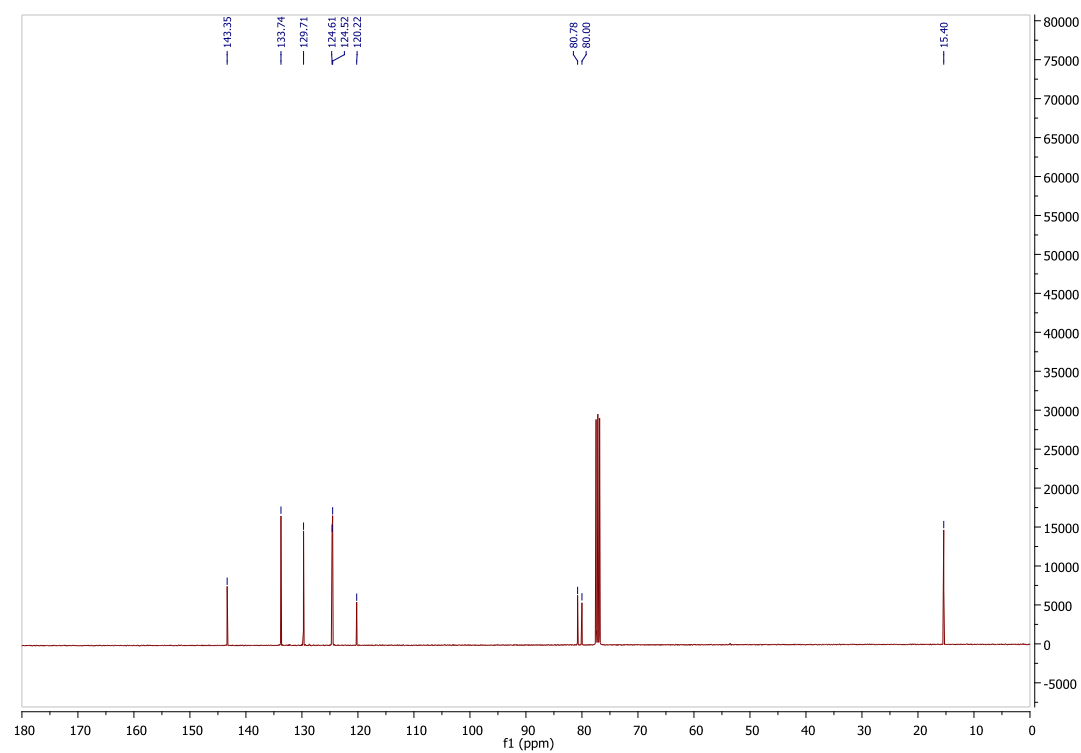

## Bis((2-(methylthio)phenyl)ethynyl)selane (11)

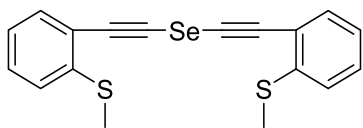

### $^{77}\text{Se}$ NMR:

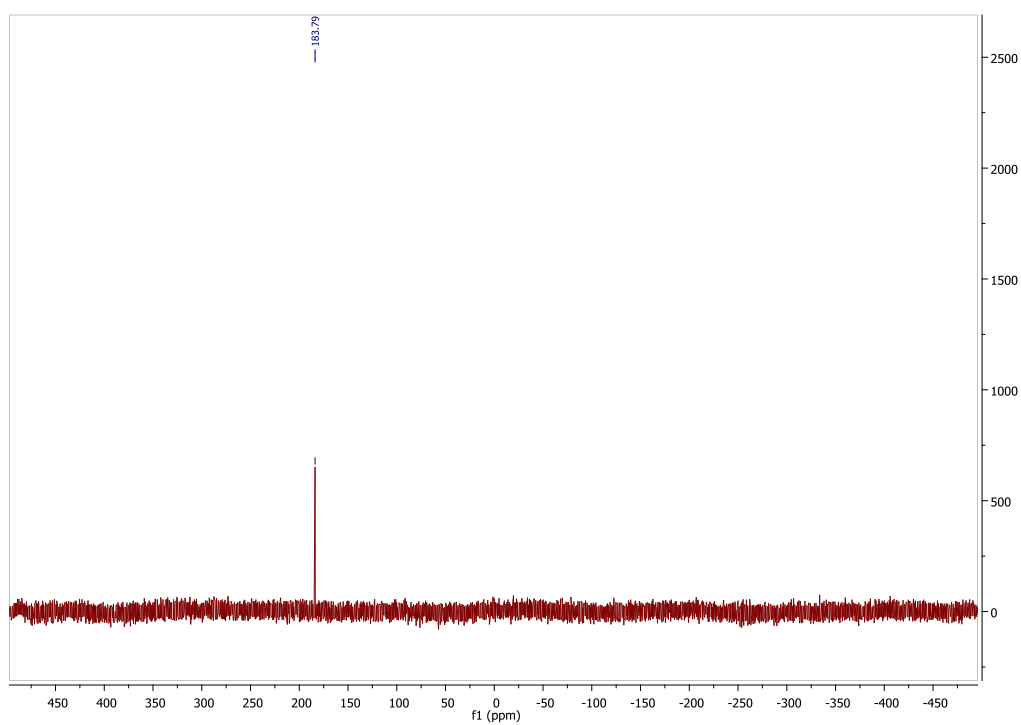

### $^1\text{H}$ NMR:

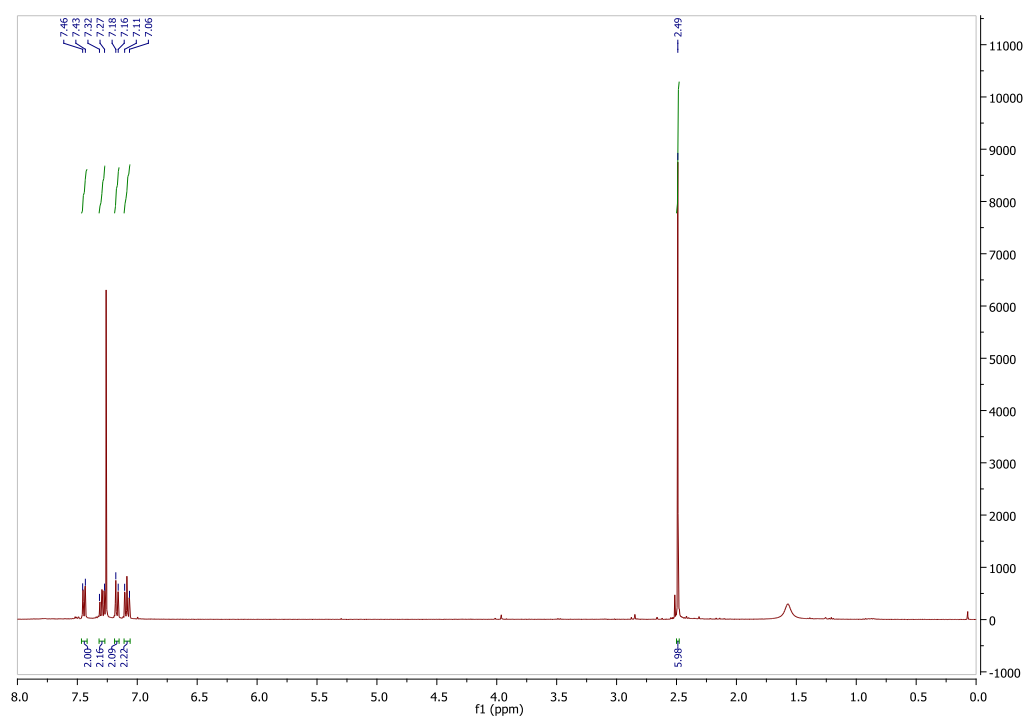

**$^{13}\text{C}$  NMR:**

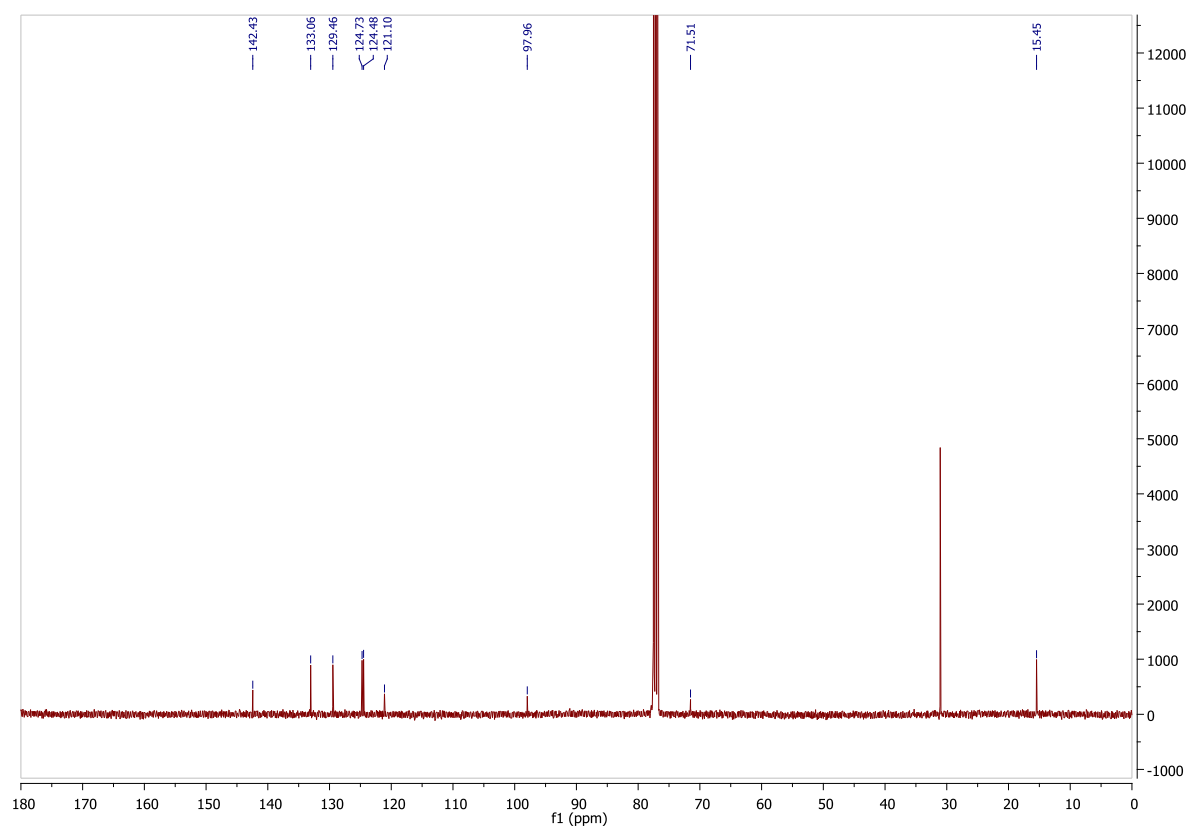



**Bis(benzothieno)[3,2-*b*:2',3'-*d*]thiophene (14a)**

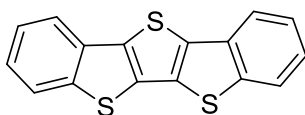

**$^1\text{H}$  NMR:**

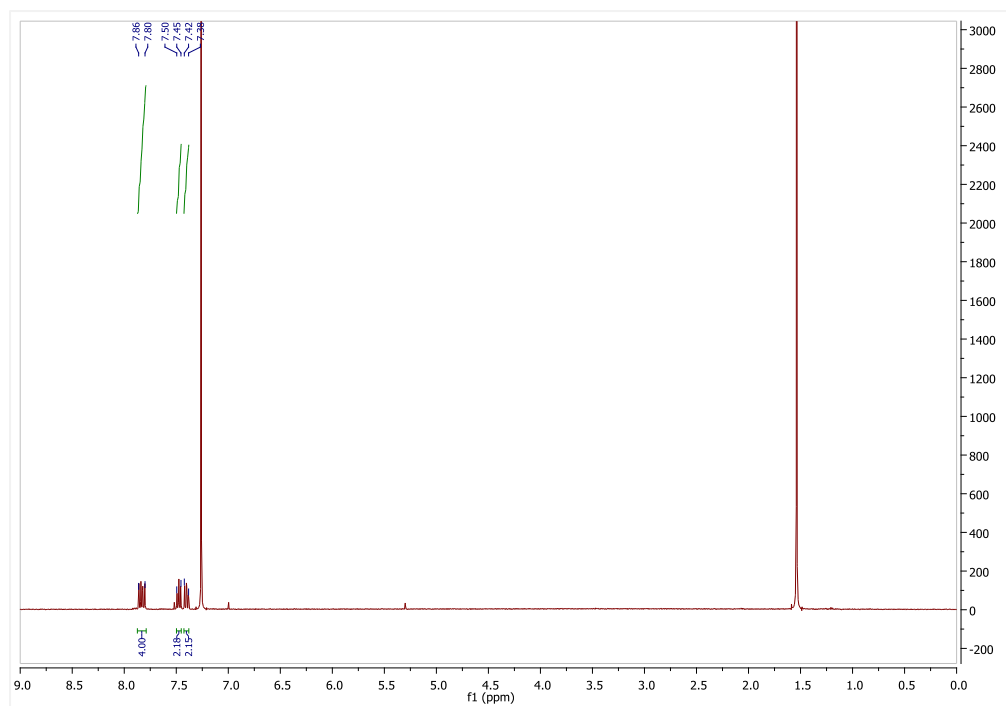

**$^{13}\text{C}$  NMR:**

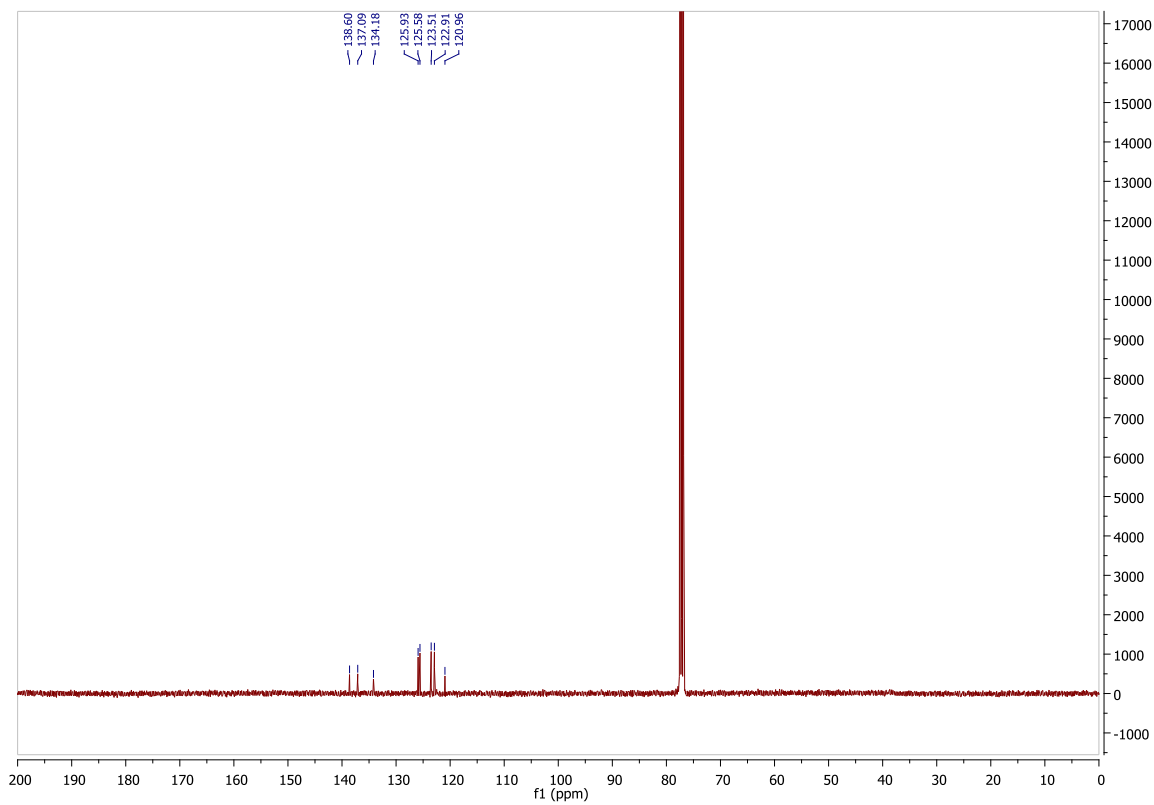

# Selenolo[3,2-*b*:4,5-*b'*]bis[1]benzothiophene (14b)

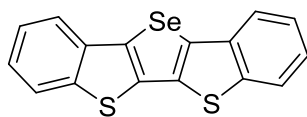

## <sup>77</sup>Se NMR:

CSIRO Akhil Gupta  
S-Se-S  
Av400\_77Se CDCl<sub>3</sub> C:\gup016 26

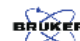

Current Data Parameters  
NAME gupta40478  
EXPNO 10  
PROCNO 1

F2 - Acquisition Parameters  
Date\_ 20160314  
Time 3:15 h  
INSTRUM Av400X  
PROBHD Z125339\_0002 f  
PULPROG zgpg30  
TD 131072  
SOLVENT CDCl<sub>3</sub>  
NS 9500  
DS 4  
SWH 75757.578 Hz  
FIDRES 1.155969 Hz  
AQ 0.8650752 sec  
RG 184.42  
RW 6.600 usec  
RX 6.50 usec  
TK 298.0 K  
D1 2.00000000 sec  
D11 0.03000000 sec  
TD0 1  
SFO1 76.3108450 MHz  
NUC1 77Se  
P1 11.00 usec  
PLW1 90.00000000 W  
SFO2 400.1328009 MHz  
NUC2 1H  
CPDPRG2 waltz65  
PCPD2 90.00 usec  
PLW2 20.00000000 W  
PLW12 0.75616997 W

F2 - Processing parameters  
SI 65536  
SF 76.3107847 MHz  
WDW EM  
SSB 0  
LB 3.00 Hz  
CB 0  
PC 1.40

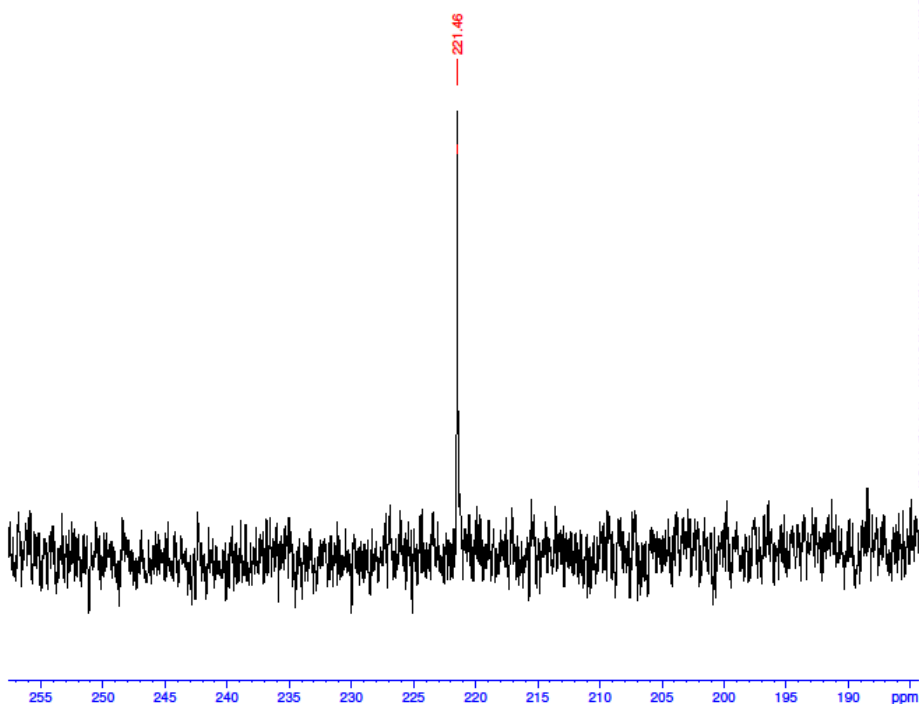

# <sup>1</sup>H NMR:

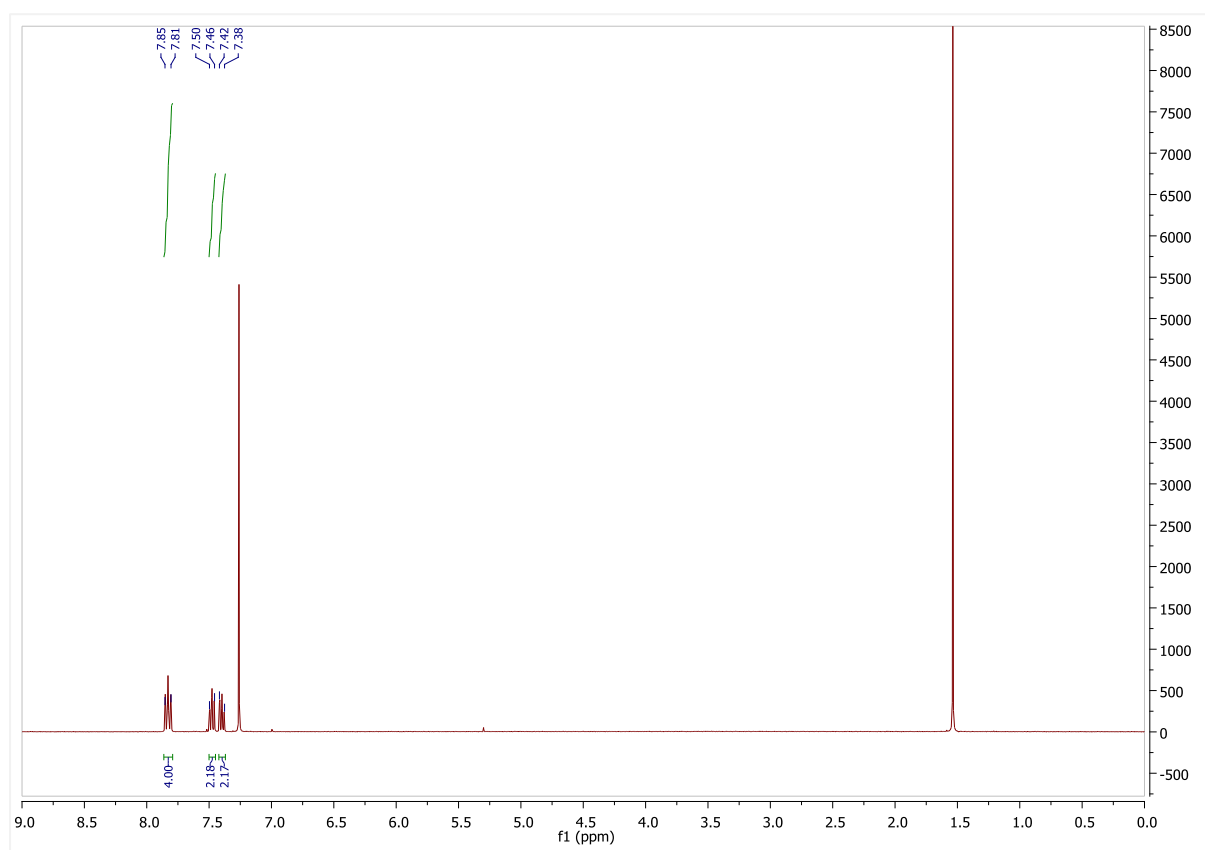

# <sup>13</sup>C NMR:

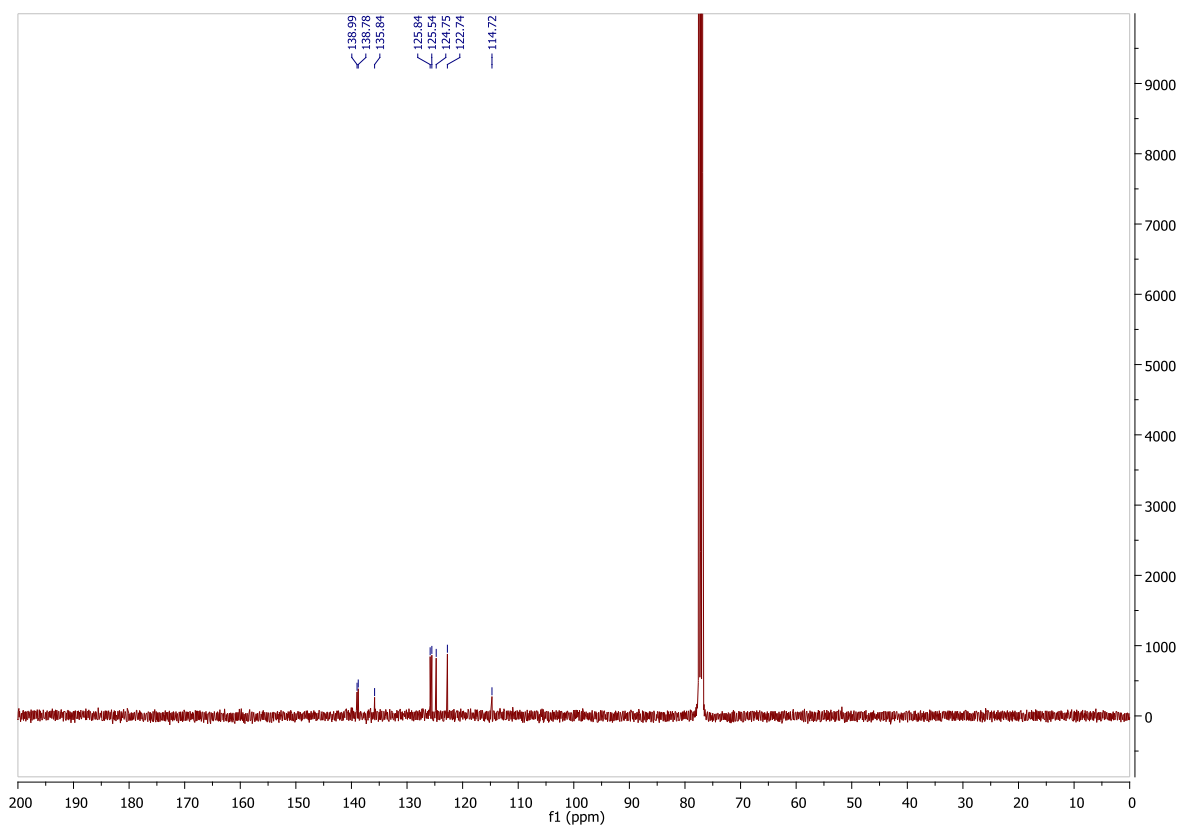

### Tellurolo[3,2-*b*:4,5-*b'*]bis[1]benzothiophene (14d)

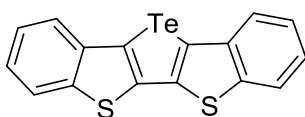

$^{125}\text{Te}$  NMR:

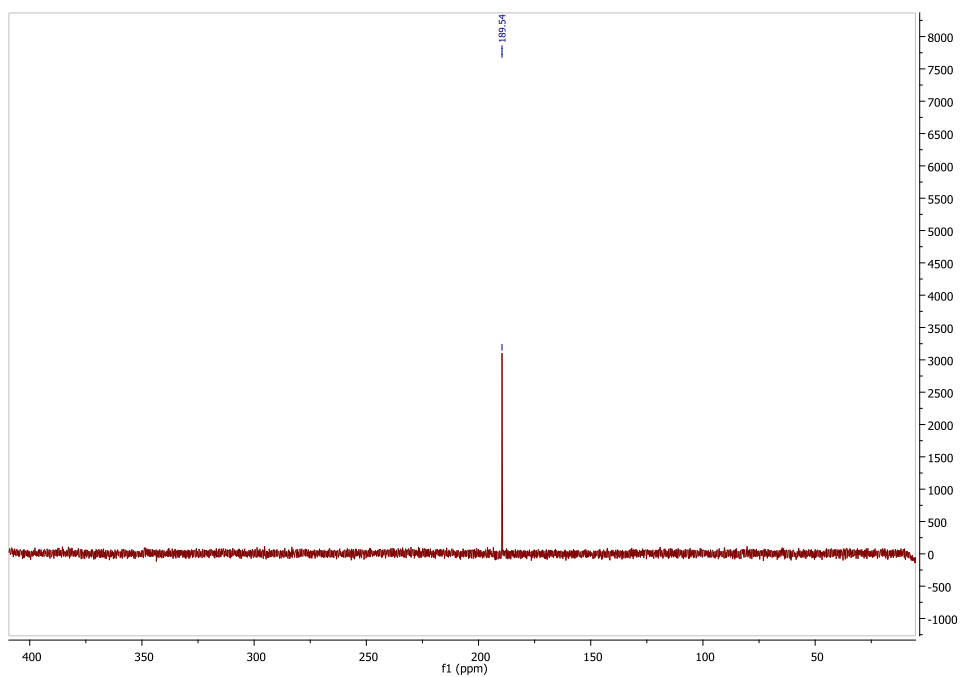

$^1\text{H}$  NMR:

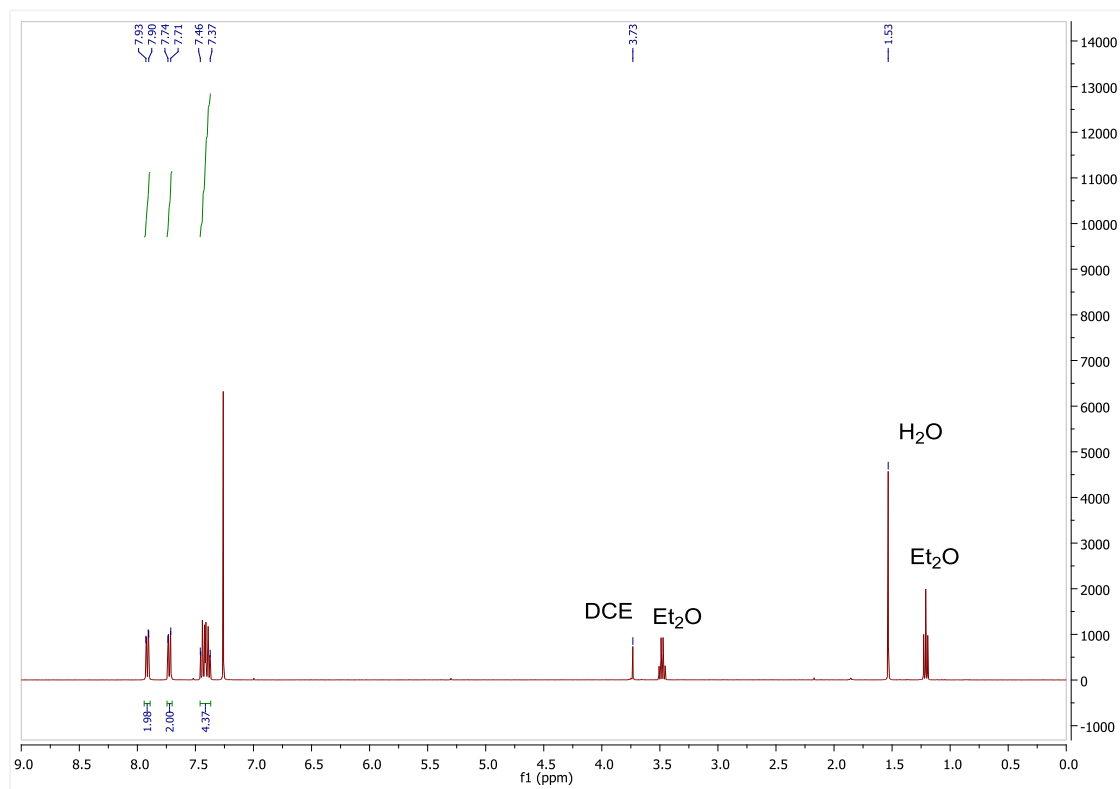

**$^{13}\text{C}$  NMR:**

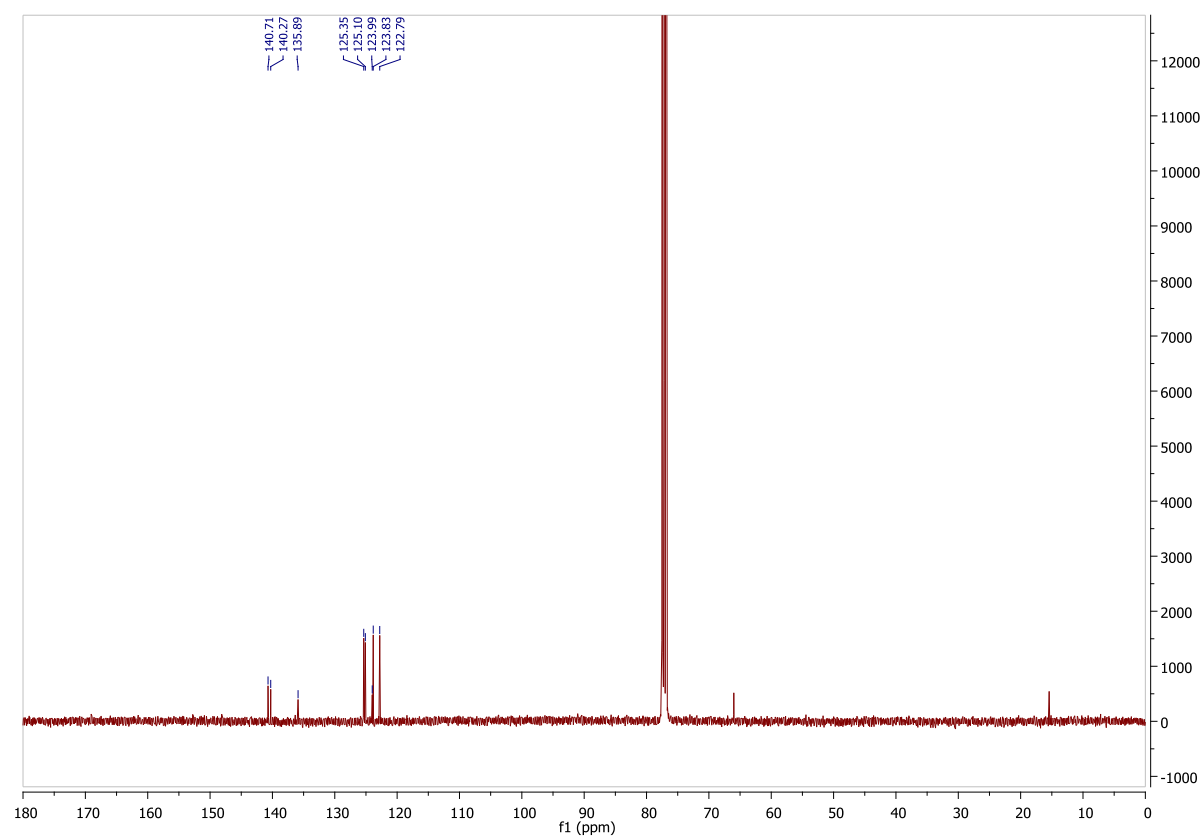

**[1,4]diselenino[2,3-*b*:6,5-*b'*]bibenzo[*b*]thiophene (15)**

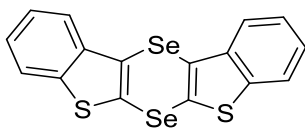

**<sup>77</sup>Se NMR:**

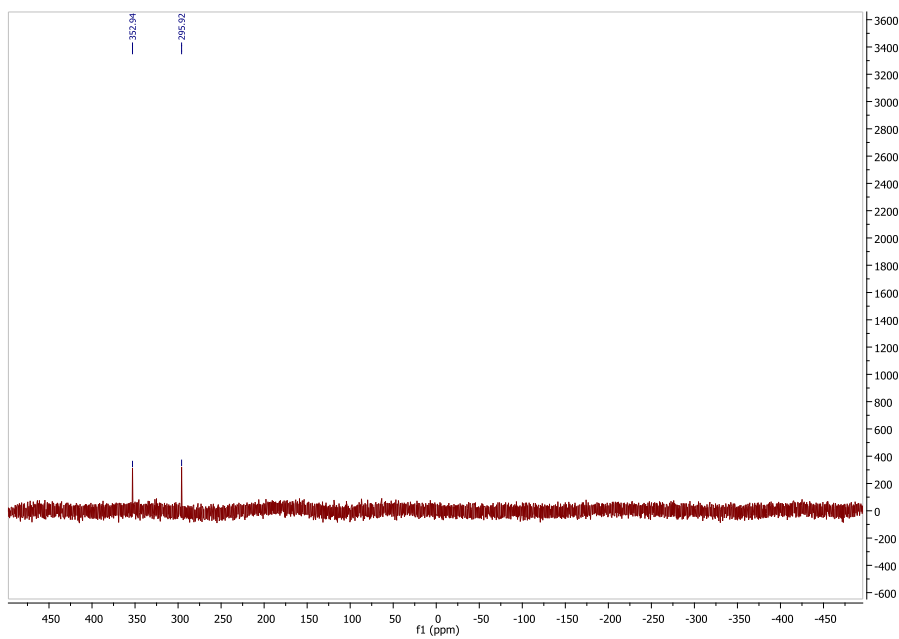

**<sup>1</sup>H NMR:**

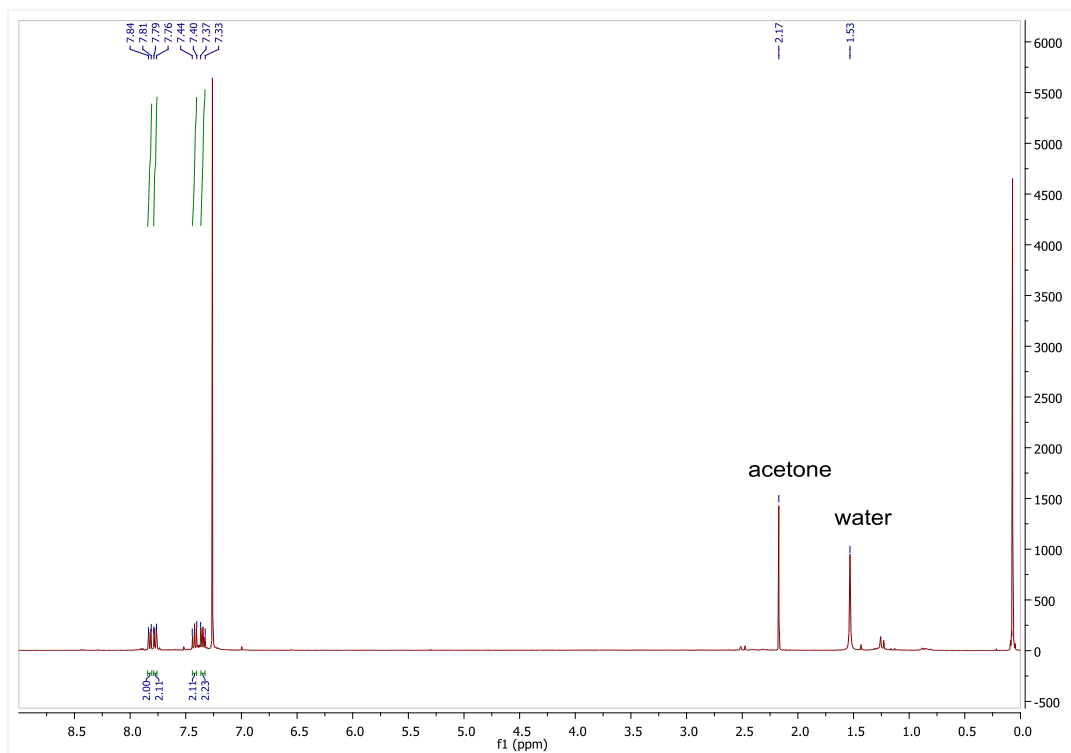

**$^{13}\text{C}$  NMR:**

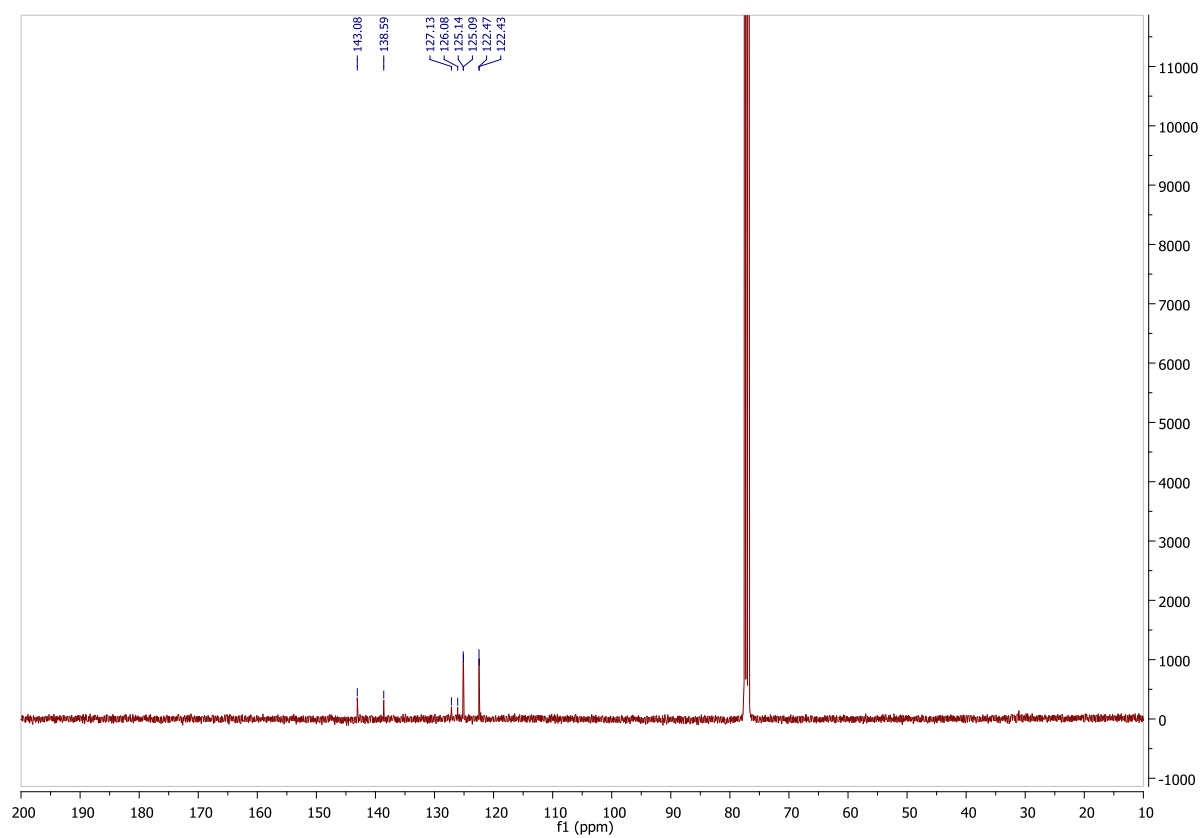

# Selenopheno[2,3-*b*:5,4-*b'*]bibenzo[*b*]thiophene (16)

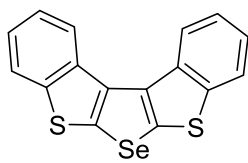

**$^{77}\text{Se}$  NMR:**

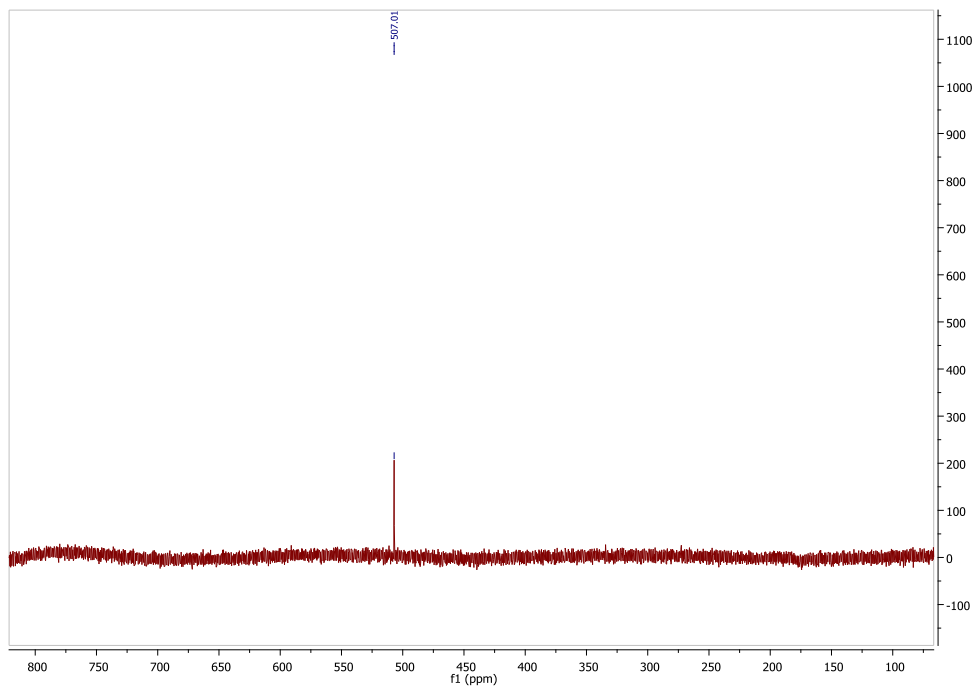

**$^1\text{H}$  NMR:**

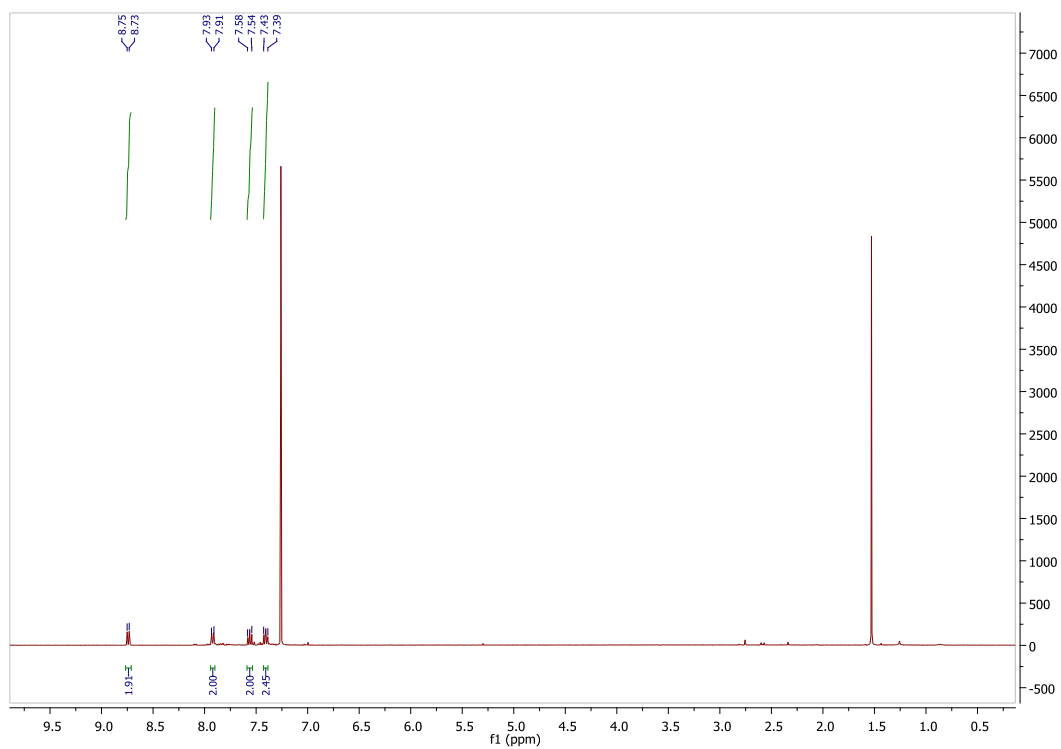



**$^{13}\text{C}$  NMR:**

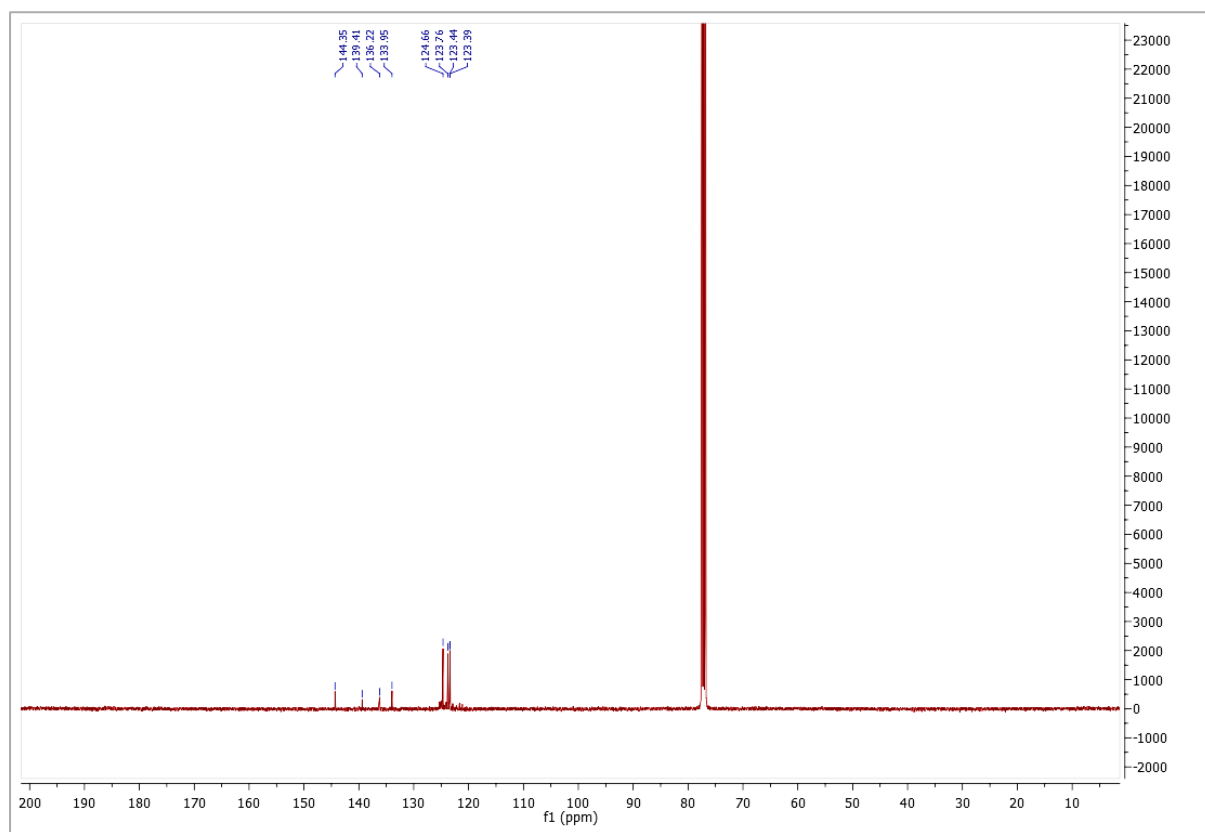

**(2-(Buta-1,3-diyn-1-yl)phenyl)(methyl)sulfane (18)**

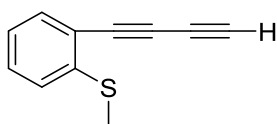

**<sup>1</sup>H NMR:**

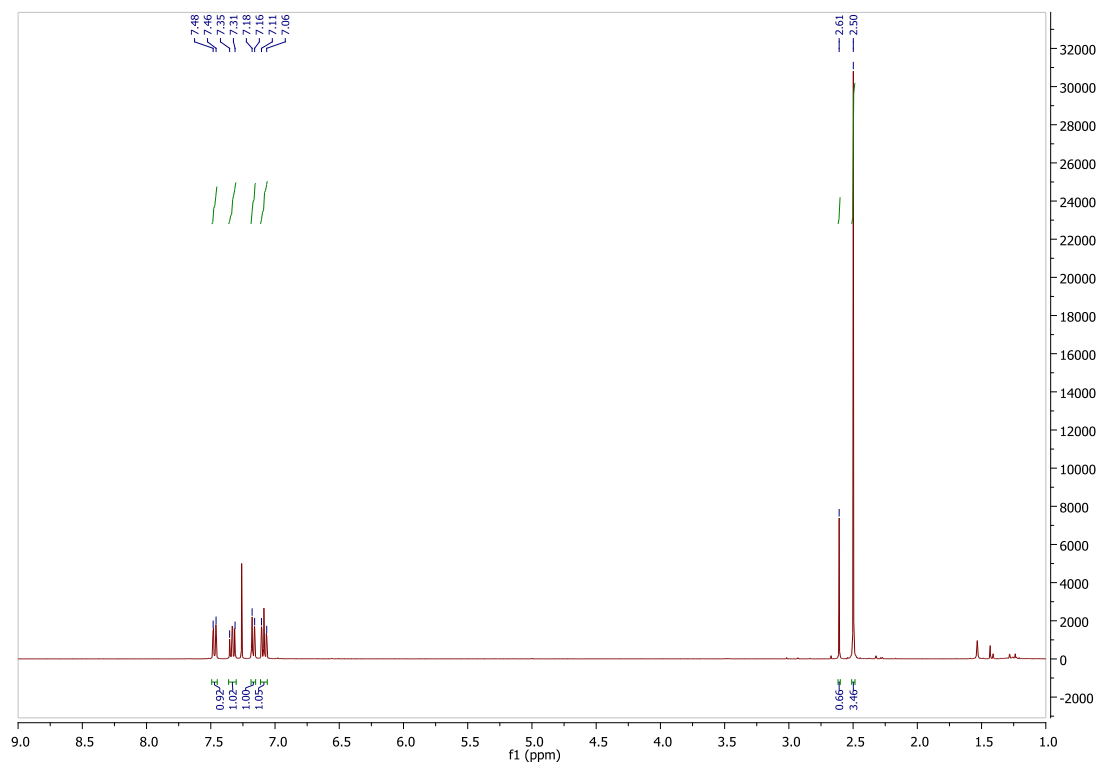

**Methyl(2-((2-(methylselanyl)phenyl)buta-1,3-diy-1-yl)phenyl)sulfane (20)**

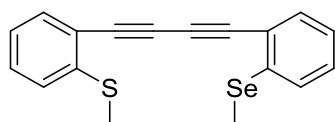

**$^{77}\text{Se}$  NMR:**

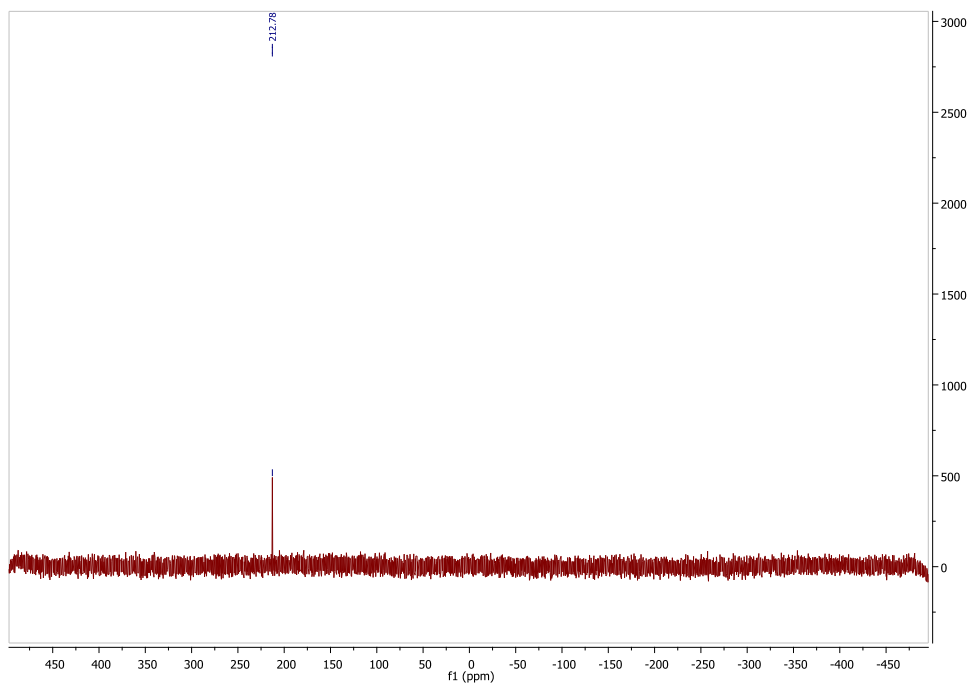

**$^1\text{H}$  NMR:**

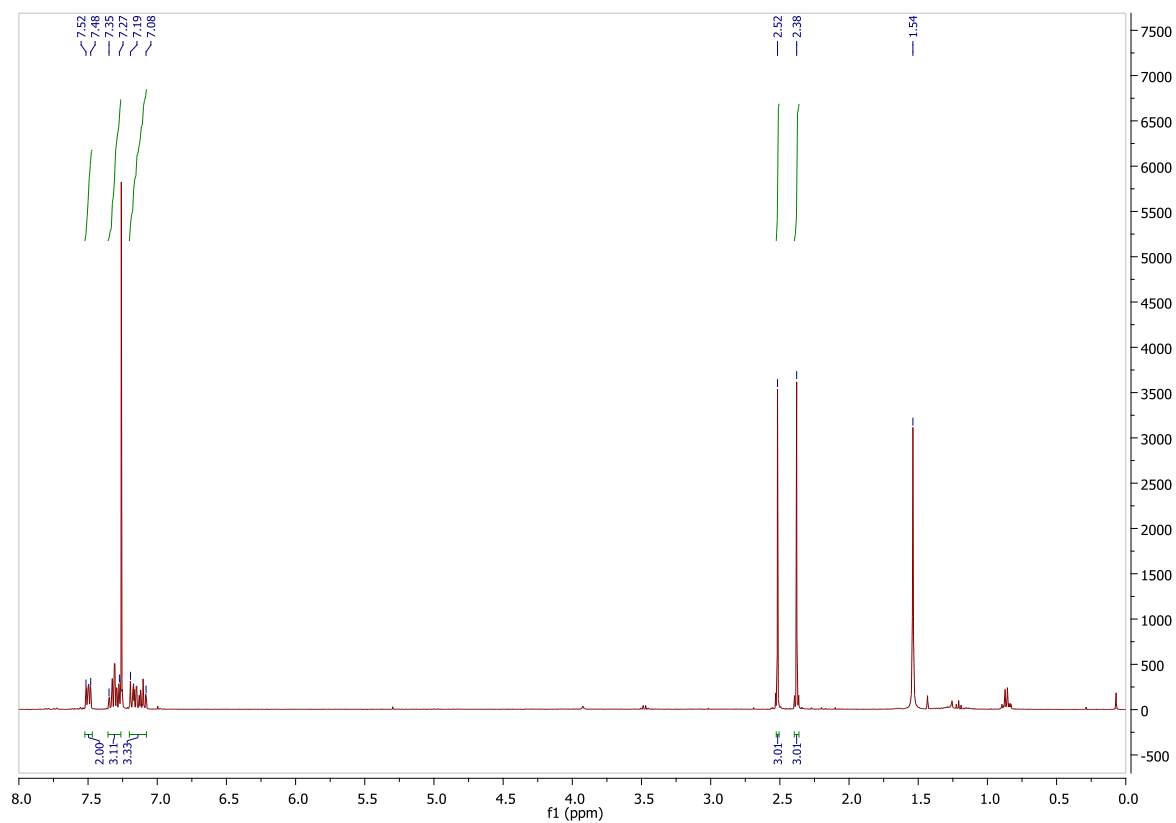

**$^{13}\text{C}$  NMR:**

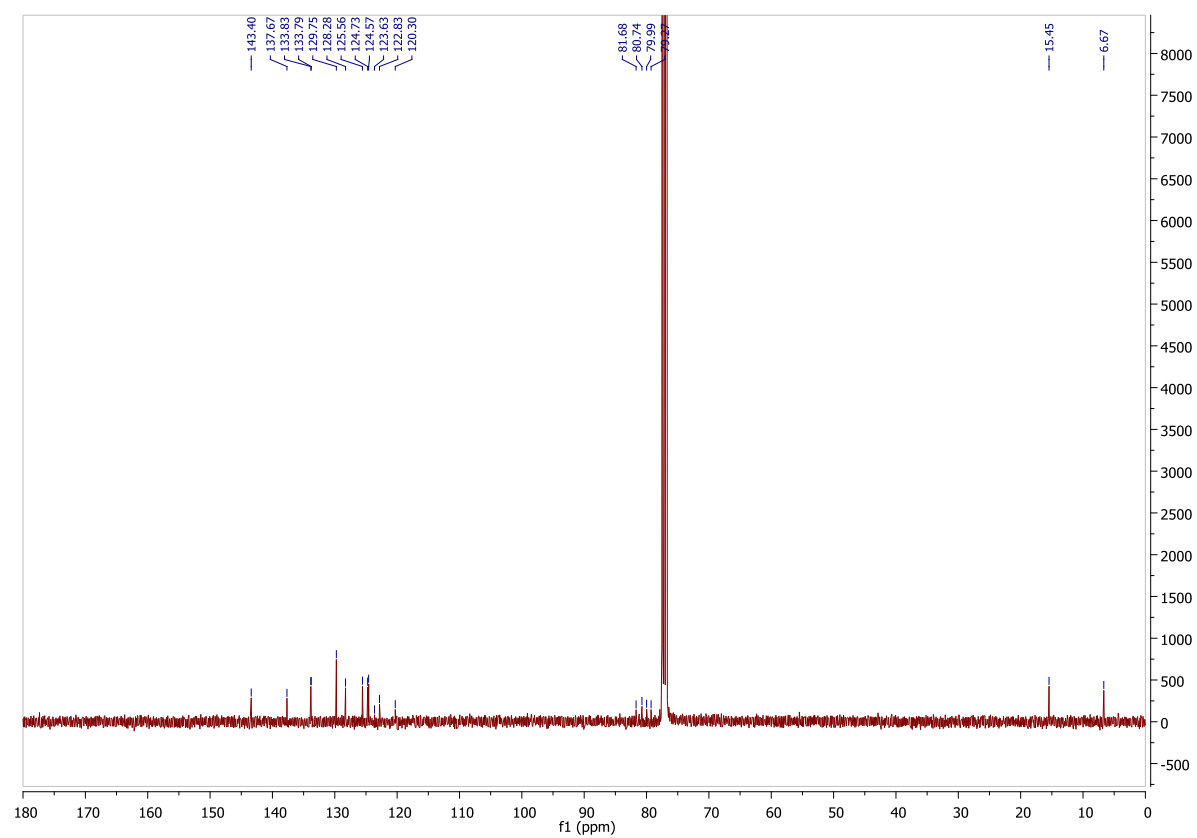

# Benzo[*b*]selenopheno[2',3':4,5]telluropheno[3,2-*b*]benzo[*b*]thiophene (21)

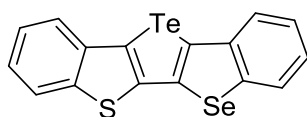

<sup>77</sup>Se NMR:

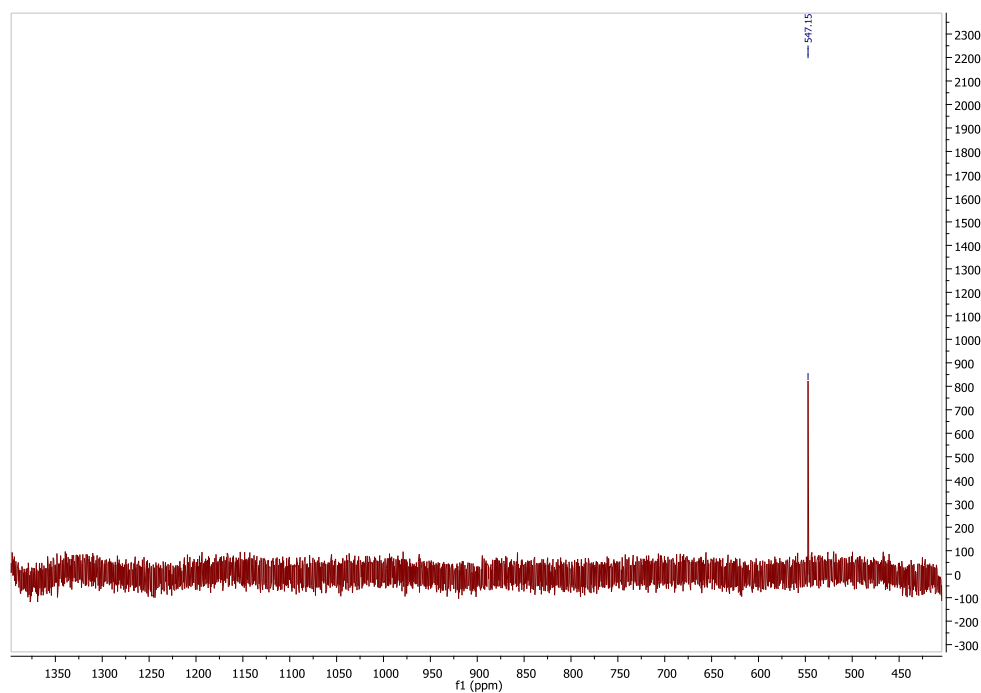

<sup>125</sup>Te NMR:

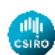

Akhil Gupta  
Av400\_125Te CDCl3 C:\1 gup016 26

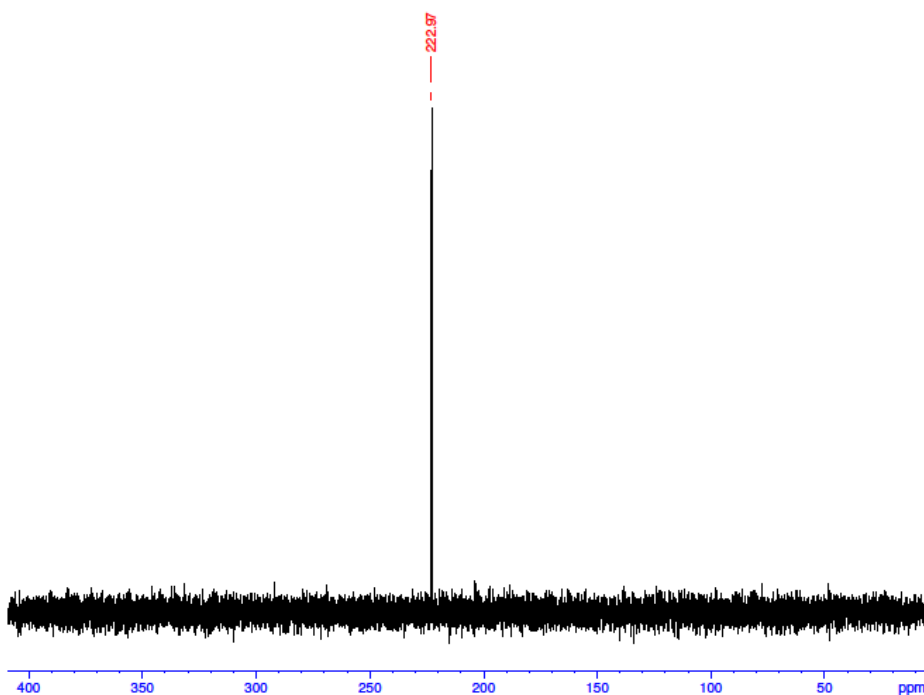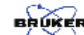

Current Data Parameters  
NAME guptaX40482  
EXPNO 10  
PROCNO 1

F2 - Acquisition Parameters  
Date\_ 20160423  
Time 15.02 h  
INSTRUM Av4000  
PROBHD Z125339\_0002 (4  
PULPROG zg  
TD 65536  
SOLVENT CDCl3  
NS 15000  
DS 4  
SWH 51020.406 Hz  
FIDRES 1.557019 Hz  
AQ 0.6422328 sec  
RG 184.42  
RW 9.800 usec  
DK 6.50 usec  
TX 298.2 K  
D1 1.00000000 sec  
TDO 1  
SFO1 126.3302415 MHz  
NUC1 125Te  
P1 12.00 usec  
PLW1 90.00000000 W

F2 - Processing parameters  
SI 65536  
SF 126.3040594 MHz  
WDW EM  
SSB 0  
LB 3.00 Hz  
GB 0  
PC 1.40

### <sup>1</sup>H NMR:

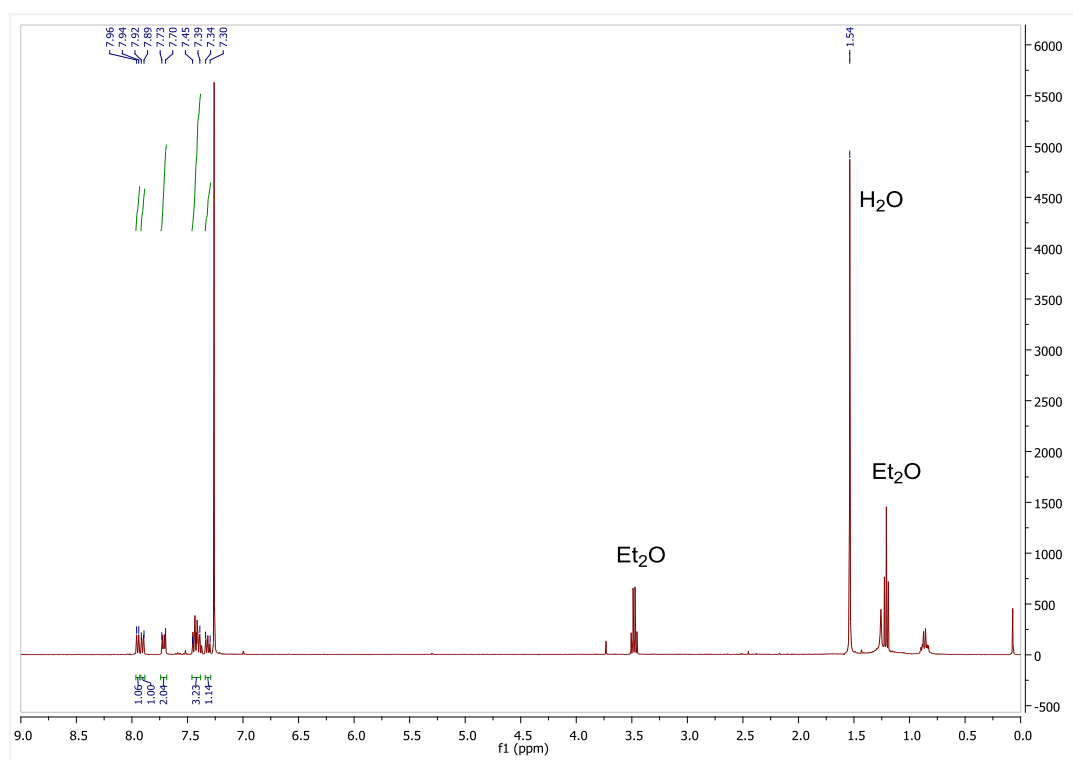

### <sup>13</sup>C NMR:

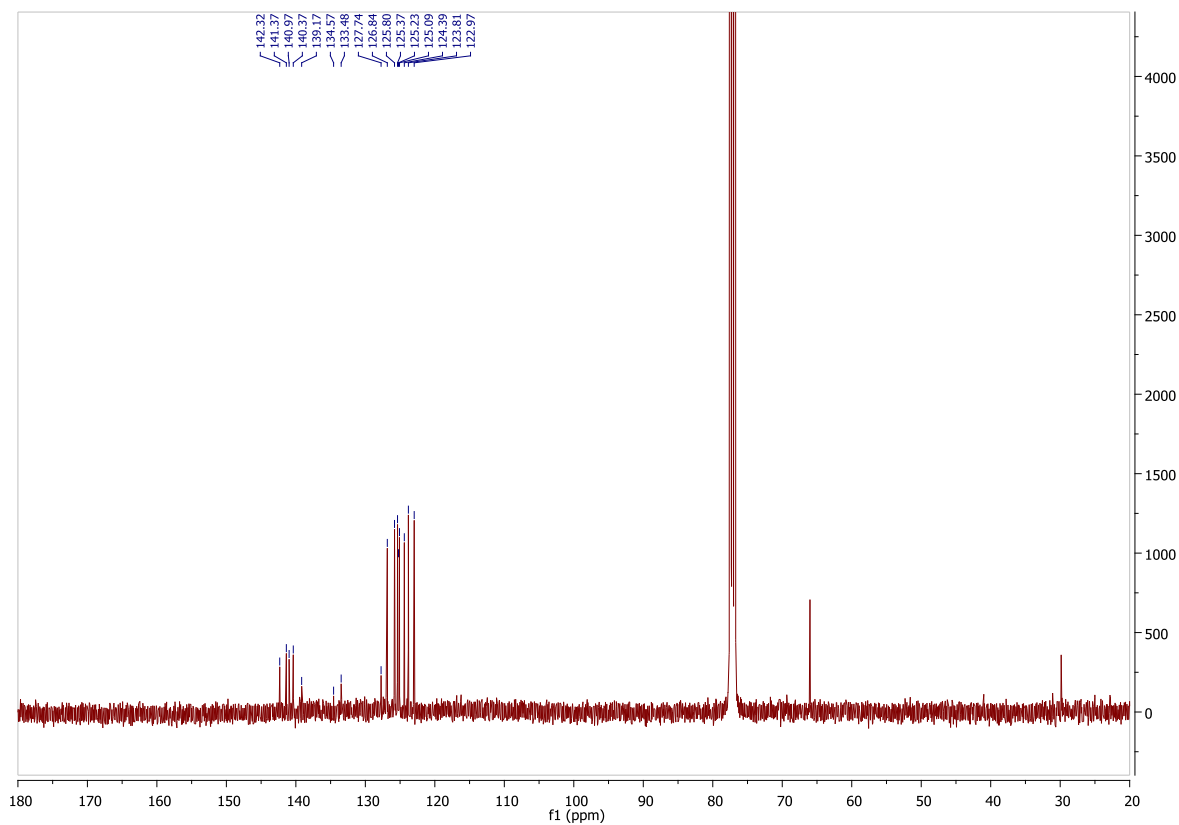

### 3,3'-Diiodo-2,2'-bibenzo[*b*]thiophene (22)

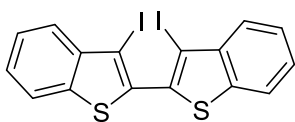

#### <sup>1</sup>H NMR:

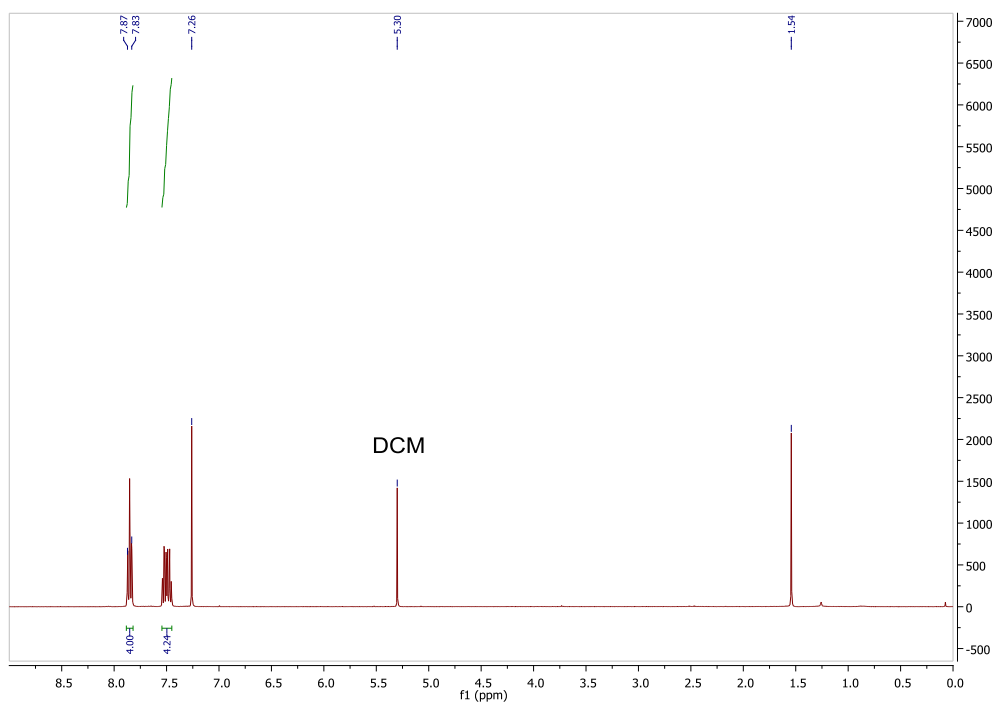

#### <sup>13</sup>C NMR:

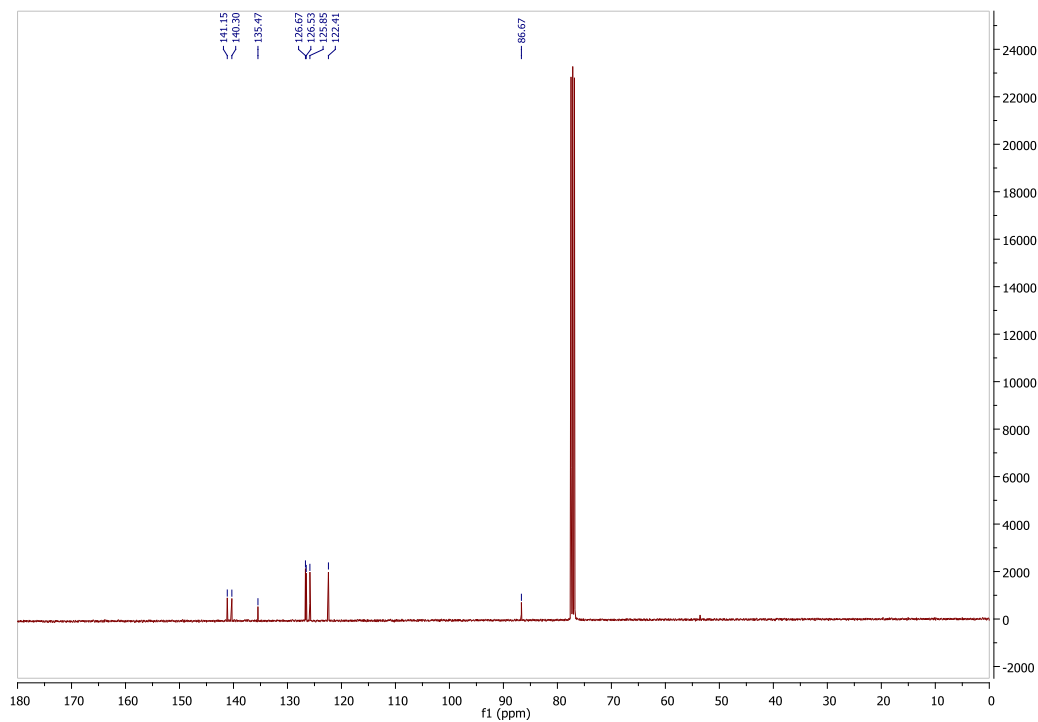

#### 4-Benzylidene-4*H*-cyclopenta[2,1-*b*:3,4-*b'*]bibenzo[*b*]thiophene (23)

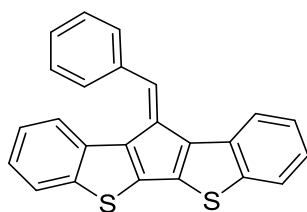

<sup>1</sup>H NMR:

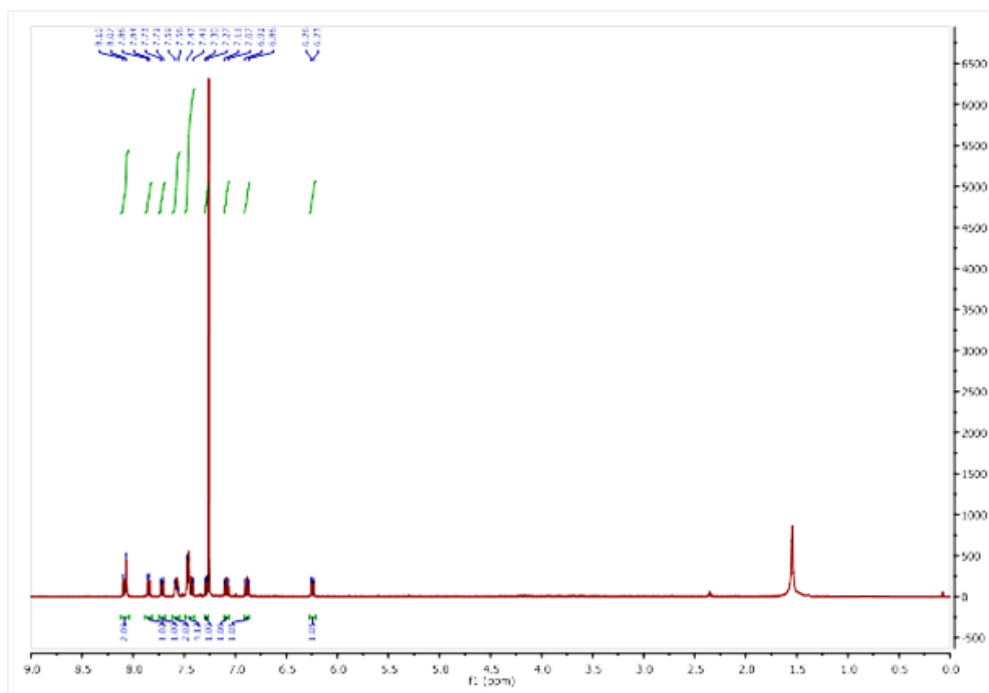

<sup>13</sup>C NMR:

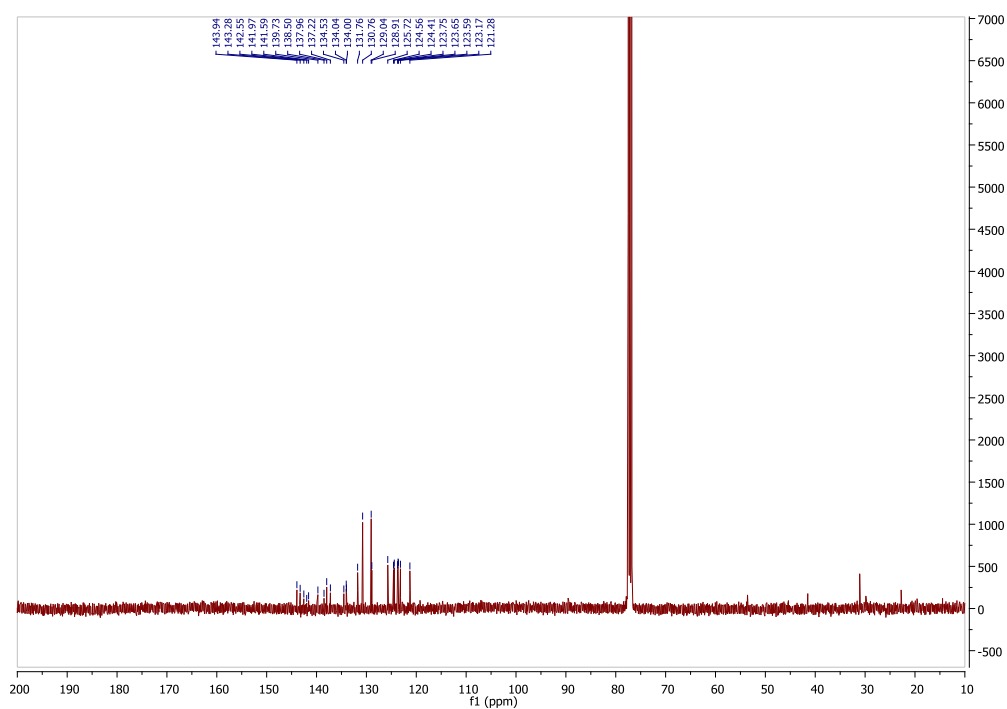



**2-(11*H*-benzo[4,5]thieno[3,2-*b*]benzo[4,5]thieno[2,3-*d*]pyrrol-11-yl)-*N,N*-dimethylethan-1-amine (24)**

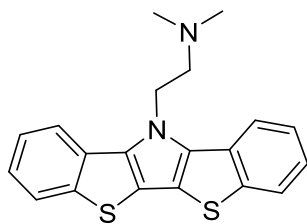

**<sup>1</sup>H NMR:**

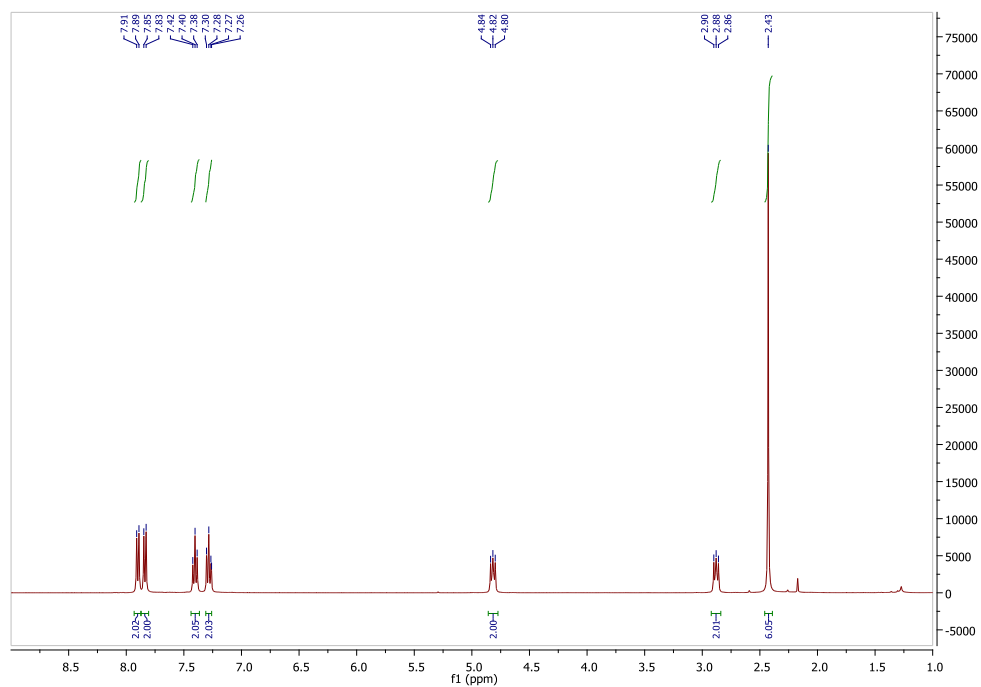

**<sup>13</sup>C NMR:**

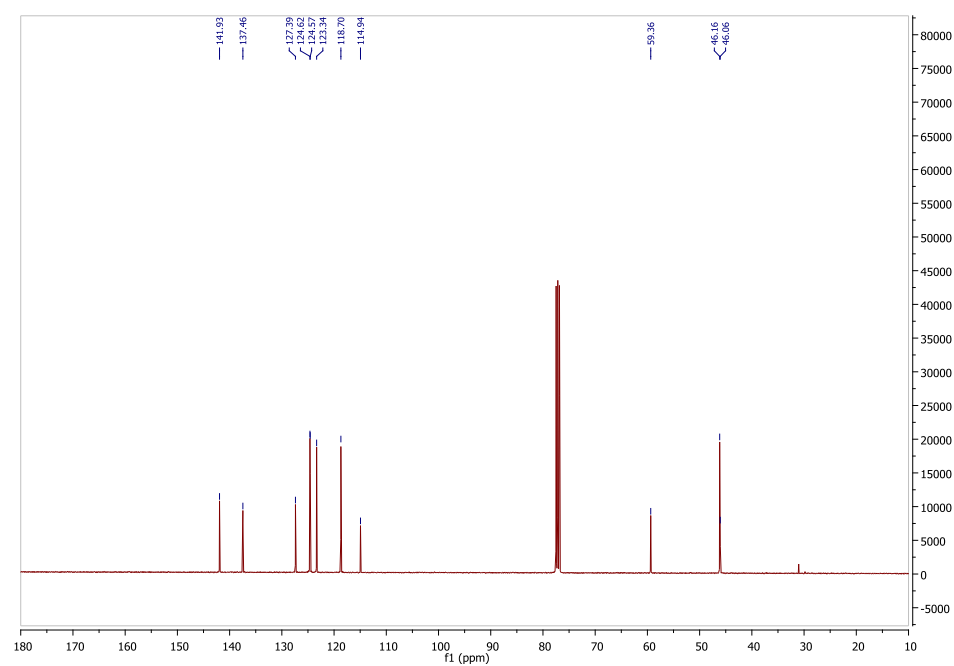

# 11,11-Dimethyl-benzo[4,5]thieno[3,2-*b*]benzo[4,5]thieno[2,3-*d*]germole (25)

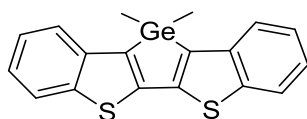

**<sup>1</sup>H NMR:**

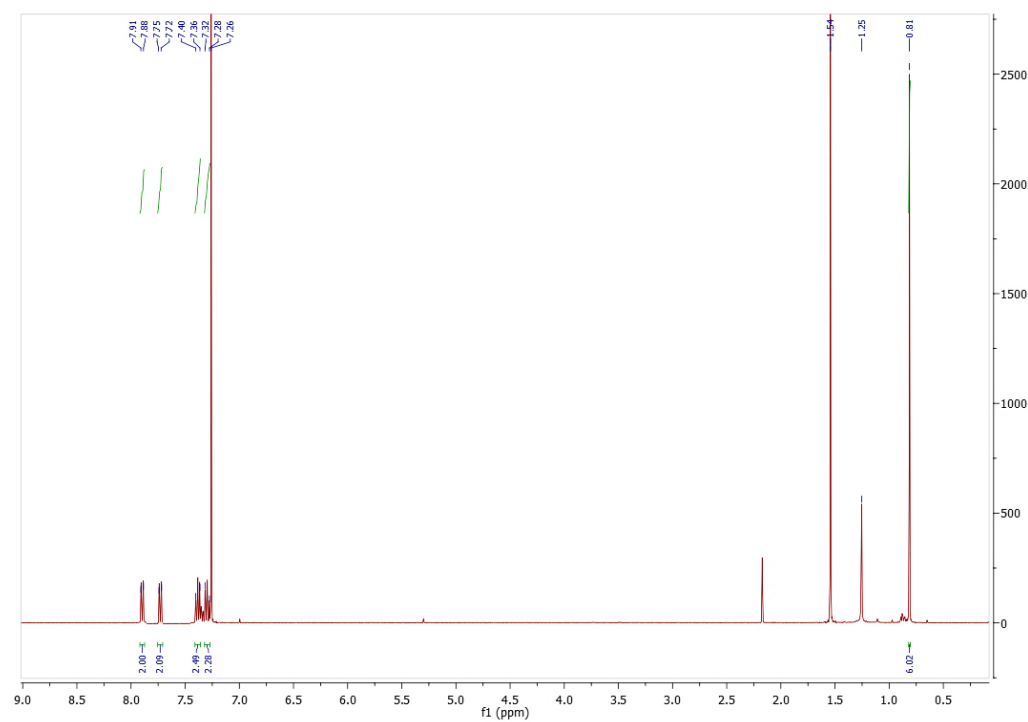

**<sup>13</sup>C NMR:**

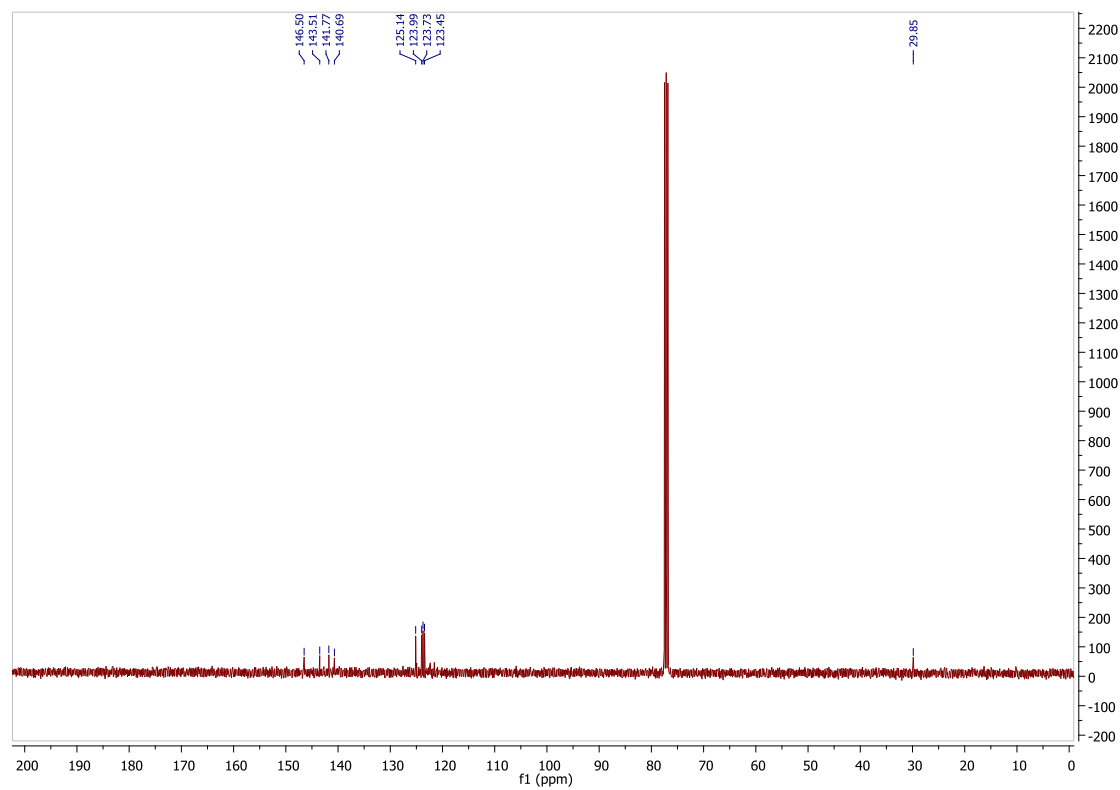

Supplement: Supplementary file 1 [file 8011276]
